1 **Pan-cancer organoid validation of tumor outlier chromosomal amplification events**

2

3

4 Ameen A. Salahudeen<sup>1\*</sup>, Kanako Yuki<sup>1\*</sup>, Jose A. Seoane<sup>2,3\*</sup>, Amanda T. Mah<sup>1</sup>, Amber R. Smith<sup>1</sup>,  
5 Kevin Kolahi<sup>1</sup>, Sean M. De la O<sup>1</sup>, Daniel J. Hart<sup>1</sup>, Jie Ding<sup>2</sup>, Zhicheng Ma<sup>2</sup>, Sammy Barkal<sup>1</sup>, Navika  
6 D. Shukla<sup>1</sup>, Chuck Zhang<sup>1</sup>, Michael A. Cantrell<sup>1</sup>, Arpit Batish<sup>1</sup>, Tatsuya Usui<sup>1</sup>, David Root<sup>4</sup>, William  
7 Hahn<sup>4,5</sup>, Christina Curtis<sup>2,6</sup>, Calvin J Kuo<sup>1,7</sup>.

8

9 <sup>1</sup>Stanford University School of Medicine, Department of Medicine, Divisions of Hematology<sup>1</sup>,  
10 Oncology<sup>2</sup>, & Genetics<sup>6</sup>, Stanford, CA, 94305

11 <sup>3</sup> Current address: Vall d'Hebron Institute of Oncology (VHIO), Barcelona, Spain, 08035

12 <sup>4</sup> Broad Institute of MIT and Harvard, 415 Main Street, Cambridge, MA, USA 02142

13 <sup>5</sup>Dana-Farber Cancer Institute, Department of Medical Oncology, 450 Brookline Avenue, Boston,  
14 MA, USA 02215

15

16 <sup>7</sup>Correspondence: [cjkuo@stanford.edu](mailto:cjkuo@stanford.edu)

17 \* Equal contribution

18

19  
20  
21  
22  
23  
24  
25  
26  
27  
28  
29  
30  
31  
32  
33  
34  
35  
36  
37  
38  
39  
40  
41

## SUMMARY

Somatic copy number gains are pervasive in many cancer types, yet their roles in oncogenesis are often poorly explored. This lack of understanding is in part due to broad extensions of copy gains across cancer genomes spanning large chromosomal regions, obscuring causal driver loci. Here we employed a multi-tissue pan-organoid modeling approach to validate candidate oncogenic loci identified within pan-cancer TCGA data by the overlap of extreme copy number amplifications with extreme expression dysregulation for each gene. The candidate outlier loci nominated by this integrative computational analysis were functionally validated by infecting cancer type-specific barcoded full length cDNA lentiviral libraries into cognate minimally transformed human and mouse organoids bearing initial oncogenic mutations from esophagus, oral cavity, colon, stomach, pancreas and lung. Presumptive amplification oncogenes were identified by barcode enrichment as a proxy for increased proliferation. Iterative analysis validated *DYRK2* at 12q15, encoding a serine-threonine kinase, as an amplified head and neck squamous carcinoma oncogene in *p53*<sup>-/-</sup> oral mucosal organoids. Similarly, *FGF3*, amplified at 11q13 in 41% of esophageal squamous carcinomas, was validated in *p53*<sup>-/-</sup> esophageal organoids in vitro and in vivo with pharmacologic inhibition by small molecule and soluble receptor FGFR antagonists. Our studies establish the feasibility of pan-organoid contextual modeling of pan-cancer candidate genomic drivers, enabling oncogene discovery and preclinical therapeutic modeling.

## 42 INTRODUCTION

43  
44 Somatic copy number aberrations (SCNAs) in the form of amplifications or deletions are a common  
45 genomic event in solid tumors (Beroukhim et al., 2010; Zack et al., 2013) and have been successfully  
46 targeted by therapeutics such as trastuzumab (Oh and Bang, 2020), whereas deletion events, such  
47 as *MTAP*, are currently the subject of therapeutic development for synthetic lethal interactions  
48 (Kryukov et al., 2016). However, a comprehensive understanding of a given SCNA's contribution to  
49 tumor biology and patient outcomes remains an aspirational goal (Kristensen et al., 2014).  
50 Furthermore, while recurrent amplified or deleted regions are increasingly delineated with large scale  
51 genomic studies, many being prognostic, which genes within the amplicon contribute to oncogenesis  
52 is often unknown.

53 Several methods have been developed for the identification of recurrent somatic copy number  
54 alterations (SCNAs), including GISTIC2, which enables the identification of focal alterations  
55 (Beroukhim et al., 2010; Zack et al., 2013) and RUBIC (van Dyk et al., 2016). However, copy number  
56 amplicons are often broad, spanning multiple megabases, making it challenging to pinpoint the driver.  
57 In order to identify loci within SCNA, we identify candidate “outlier” genes demonstrating both high-  
58 level copy number alterations and concordant extreme expression dysregulation. The outlier approach  
59 is highly discriminatory, prioritizing candidate drivers within broad SCNA regions, highlighting known  
60 oncogenes and tumor suppressors and numerous novel candidates, as demonstrated in breast cancer  
61 (Curtis et al. 2012), several of which have been functionally validated (Sanchez-Garcia et al., 2014;  
62 Turner et al., 2010). Related methods have been used to identify chromosomal rearrangements  
63 (Tomlins et al., 2005) by comparing “normal” with dysregulated gene expression. However, to date a  
64 systematic screen of candidate SCNA drivers across primary tissues not been undertaken.

65 To functionally test hypotheses from genomic cancer analyses, immortalized cell lines or  
66 xenograft models are frequently used. Such systems are not optimal for several reasons including  
67 mono- or oligo-clonality (i.e. lack of tumor heterogeneity), secondary mutation burden in cell lines, the  
68 limited tractability of patient derived xenografts, and low throughput of genetically engineered mice. In

69 contrast, in vitro organotypic culture of untransformed primary tissues as 3-dimensional organoids  
70 offers an extremely promising approach for driver oncogene validation (Lo et al., 2020). Indeed,  
71 organoids faithfully recapitulate multilineage differentiation and tissue architecture, and yet retain  
72 experimental tractability for in vitro genetic and pharmacologic studies (Broutier et al., 2017; Du et al.,  
73 2020; Francies et al., 2019; Huang et al., 2015; Li et al., 2018; Li et al., 2014; Matano et al., 2015;  
74 Nadauld et al., 2014; Salahudeen and Kuo, 2015; Sato et al., 2011; van de Wetering et al., 2015). We  
75 and others have initiated gastrointestinal malignancies by oncogene-engineering wild-type organoids  
76 from mouse (Li et al., 2014; Nadauld et al., 2014) and human tissues (Drost et al., 2015; Lo et al.,  
77 2021; Matano et al., 2015). Importantly, these cancer organoid models are generated by introduction  
78 of “first hit” oncogenic alleles into a normal wild-type genome, representing predominant drivers of the  
79 cognate cancer type. Subsequently, putative oncogenic loci can be overlaid and functionally assessed  
80 in a scalable, rapid, and reproducible manner.

81 Here, we pursued a pan-cancer approach to amplified oncogene validation, exploiting the  
82 *tabula rasa* background of a diverse range of first hit-engineered organoid models to rapidly interrogate  
83 the oncogenic potential of candidate amplified/overexpressed outlier loci across several solid tumor  
84 histologies. The transduction of lentiviral barcoded open reading frame (ORF) libraries, representing  
85 tumor subtype-specific SCNAs, into cognate tissue specific organoid models, then allowed systematic  
86 functional screening of oncogenicity, followed by iterative hit validation and assessment of  
87 therapeutics.

88

89

90

91 **RESULTS**

92

93 **Pan-cancer bioinformatic identification of tumor outlier loci exhibiting matched extreme copy**  
94 **number alteration and expression**

95 The analysis of copy number (CN) somatic events in cancer is impeded by broad extension of somatic  
96 CN events over the genome, thus increasing the likelihood of false positives. Most methods for copy  
97 number driver identification analyze only DNA and thus include alterations that have no effect on  
98 expression. The approaches that use an integrative expression/copy number methodology often  
99 include the expression information by identifying genes whose expression is correlated with CN  
100 values. This approach has the limitation that regression between the CN and expression values is  
101 often polynomial, and not evenly distributed between high and low copy number values (i.e. coefficient  
102 between higher copy number and higher expression is always higher than the lower copy number and  
103 lower expression), thus potentially including false negatives. Building upon our prior studies (Curtis et  
104 al., 2012), we sought to integrate gene expression information into our model to more accurately  
105 identify outliers where we propose putative drivers are those with a modification in the copy number  
106 landscape at given position with a corresponding functional effect in gene expression.

107 To refine putative amplified SCNAs consequential to oncogenesis, we matched gene-based  
108 extreme copy number events (amplifications and deletions) with extreme expression effects (**Fig. 1A**).  
109 In order to identify which samples falls in the overexpressed tail, we calculate the threshold for the 5%  
110 right and 5% left values in the theoretical distribution (represented by the vertical lines **Fig. S1A**). With  
111 these two thresholds we identified expression outliers, which are the values in the real expression  
112 distribution that are greater than right threshold (overexpression outliers). We then matched  
113 overexpression outliers with extreme copy number amplifications (defined as samples with a  
114 segmented copy number value higher than 6 times the standard deviation) in sequencing data from  
115 TCGA datasets COAD, ESCA, HNSC, LUAD, PAAD and STAD (**Fig. 1B-G**).

116

117

## 118 Derivation of a pan-cancer panel of first hit-engineered organoid models

119 We then evaluated the aforementioned cancer type-specific candidate overexpression outliers in  
120 minimally transformed organoid models containing single or double oncogenic mutations, generated  
121 from the corresponding tissues of origin. Primary epithelia isolated from human or mouse were  
122 cultured as previously described (Li et al., 2014; Lo et al., 2021; Neal et al., 2018; Salahudeen et al.,  
123 2020). We generated *Kras*<sup>G12D</sup> mouse pancreatic organoids by culturing *LSL-Kras*<sup>G12D</sup> (Hingorani et  
124 al., 2003) pancreas as air-liquid interface organoids and infected with adenovirus-Cre-GFP to activate  
125 expression of latent *Kras*<sup>G12D</sup> (Li et al., 2014) (**Fig. S2A-B**). Human wild-type gastric and colon  
126 organoids were grown under standard submerged methods (Lo et al., 2021; Matano et al., 2015; Sato  
127 et al., 2011). *APC*<sup>-/-</sup> colon organoids were generated by CRISPR/Cas9 (Drost et al., 2015; Matano et  
128 al., 2015), while *TP53*<sup>R175H</sup> gastric organoids were generated by stable lentivirus transduction (**Fig.**  
129 **S2C-F**).

130 For this study, we also generated three novel organoid models corresponding to *p53*-null (*p53*<sup>-/-</sup>  
131 <sup>-/-</sup>) oral squamous cell carcinoma, *p53*<sup>-/-</sup> esophageal squamous cell carcinoma and *Kras*<sup>G12D</sup>; *p53*<sup>-/-</sup> lung  
132 adenocarcinoma, described below. Mutational inactivation of the *p53* tumor suppressor gene occurs  
133 at high frequency of primary HPV-negative HNSCCs. We established normal oral mucosa (OM)  
134 organoids from mouse glossal epithelium cultured as air-liquid interface (ALI) organoids (**Fig. 2A**).  
135 Normal oral mucosal tissue consists of stratified squamous epithelium and connective tissue. In the  
136 basal layer, KI67, p63 and KRT5 are expressed (Ebrahimi and Botelho, 2017; Jones et al., 2019).  
137 Mouse OM ALI organoids recapitulated squamous epithelial structures (**Fig. 2A**). The basal cell  
138 marker KRT5 was expressed in the outer periphery, in which KI67+ cells were also detected,  
139 suggesting that cell proliferation occurred mainly at these sites (**Fig. 2A**). These mouse OM organoids  
140 were maintained in ALI for more than 1 year.

141 To initiate oncogenic transformation in vitro, mouse *p53*<sup>flax/flax</sup> mouse OM organoids were  
142 infected with adenovirus Cre-GFP to create a contextual *p53*<sup>-/-</sup> oral cancer model (**Fig. 2B-F**). These  
143 *p53*<sup>-/-</sup> organoids exhibited a stratified cell arrangement with a thick KRT5+ cell layer and multilayered  
144 KI67+ cells upon long term culture (**Fig. 2B**). *p53* deletion enhanced proliferation (**Fig. 2C,D**),

145 accompanied by *Ki67* upregulation and *Cdkn1a* downregulation (**Fig. 2E**). Furthermore, *p53* deletion  
146 induced in vivo tumorigenicity and metastasis of mouse OM organoids (**Fig. 2F-H**).

147 Mouse OM organoids could also be grown in submerged formats where they exhibited similar  
148 organization as ALI OM organoids with an outer rim of KRT5+ KI67+ proliferative basal cells and could  
149 again be cultured for more than 1 year (**Fig. S3A**). Human oral mucosa could be cultured for  
150 approximately 6 weeks in submerged or collagen air-liquid interface formats and included KRT5+  
151 ECAD+ basal cells and the notable presence of keratinization within the organoid lumens (**Fig. S3B,C**).  
152 Upon lentiviral transduction with the oncogenic R175H allele of *p53*, these could be serially passaged  
153 up to 6 months but without obvious signs of dysplasia (data not shown).

154 In addition to oral squamous cell carcinoma, we also generated ALI esophageal squamous  
155 organoids using the same *p53<sup>flox/flox</sup>* murine model (**Fig. 3A-C**). Esophageal organoids from *p53<sup>flox/flox</sup>*  
156 mice formed KRT5+ squamous epithelium with similar morphology to OM organoids (**Fig. 3C**). Upon  
157 in vitro infection with adenovirus Cre-GFP, the resultant *p53<sup>-/-</sup>* esophageal organoids exhibited  
158 dysplasia (**Fig. 3D**), maintenance of KRT5 (**Fig. 3E**), and loss of *p53* expression (**Fig. 3F**). Further, we  
159 observed in vivo tumorigenicity when *p53<sup>-/-</sup>* ESCC organoids were subcutaneously transplanted into  
160 immunodeficient mice with keratin pearl formation and other histologic features consistent with  
161 squamous cell carcinoma (**Fig. 3G,H**).

162 Lastly, NSCLC lung adenocarcinoma organoids were generated from murine pulmonary  
163 parenchymal tissue using a protocol similar to our previous studies (Li et al., 2014; Salahudeen et al.,  
164 2020). Accordingly, ALI lung organoids were generated from unexcised LSL-*Kras<sup>G12D</sup>*; *p53<sup>flox/flox</sup>* mice  
165 (Hingorani et al., 2003; Jackson et al., 2005). Upon infection with a negative control adenovirus  
166 expressing an immunoglobulin Fc fragment (Ad-Fc), these wild-type lung organoids proliferated in  
167 media containing EGF and Noggin (EN), but not in basal F12 media, similar to our prior studies in  
168 human lung organoids (Salahudeen et al., 2020). However, upon in vitro adenovirus Cre-GFP  
169 infection, the lung ALI organoids were converted to a *Kras<sup>G12D</sup>*; *p53<sup>-/-</sup>* genotype and exhibited EGF  
170 independence (**Fig. 4A**), expression of mutant *Kras<sup>G12D</sup>* and loss of *p53* (**Fig. 4B,C**), retention of TTF-  
171 1 expression (**Fig. 4D**), and in vivo tumorigenicity and metastases (**Fig. 4E-G**).

172

173 **Contextual tissue-specific functional screening of pan-cancer copy number amplification**  
174 **outliers**

175 Having characterized these 6 tissue-specific, minimally-transformed oncogenic models, we then  
176 performed integrative analysis on the expression outliers for each cognate cancer type (**Fig. 1**) to  
177 computationally identify over 1000 candidate amplification outliers (**Table S1**). From these loci, we  
178 selected 393 available full-length cDNAs from the CCBS-Broad lentivirus ORF collection (Yang et al.,  
179 2011) having barcodes external to the ORFs, facilitating pooled screens. A custom ORF library was  
180 thus generated for each of the 6 cancer-specific outlier predictions, for infection of the corresponding  
181 minimally-transformed tissue organoids. For instance, esophageal ESCC TCGA outliers were  
182 represented by an equivalent barcoded lentivirus ORF library, for infection into  $p53^{-/-}$  esophageal  
183 organoids (**Fig. S1B, Fig. 5**).

184 Lentiviruses were generated in arrayed format and pooled for equal titer amounts (**STAR**  
185 **Methods**). Loci encoding already-established oncogenic drivers were deliberately not included in our  
186 screen to avoid potentially dominant “jackpot” effects that could obscure contributions of novel outliers.  
187 Organoids were infected with the pooled virus corresponding to the outliers for that histologic site and  
188 screened as independent technical replicates, and aliquots from initial plating (t=0) and after four  
189 passages (terminal time point) were collected. NGS sequencing was performed to evaluate barcode  
190 enrichment at the terminal time point, typically at culture day 30-50 days, versus t=0 (**Fig. 5A-F**).  
191 Organoids were subjected to prolonged culture after pooled lentiviral infection and puromycin  
192 selection; barcodes were quantitated at each time point by NGS. Barcode distribution consistency was  
193 observed across technical replicate screens, typically n=4 (**Fig. S4-6**). Notably, outliers were  
194 functionally enriched in cell cycle processes (CDK4, CDK6 in gastric and pancreas), DNA repair  
195 (XRCC6BP1 in lung), and kinase signaling (KRAS, AKT in colon) (**Fig. 5A-F**). Evaluation of these  
196 genes and other enriched outliers will be undertaken in these adenocarcinoma models in future work.  
197 Interestingly, in  $p53^{R175H}$  human gastric organoids, two of the top five outliers corresponded to *CDK6*.



198 When analyzing gastric cancer outliers that displayed >2-fold change vs. t=0, six of the top hits  
199 (DYRK1B, SAMD4B, MRPS12, SIRT2, EIF3K, and PAF1) all co-localized to chromosome 19q13.2.

200 Screens in the *p53*<sup>-/-</sup> oral mucosa organoid model identified the Dual Specificity Tyrosine  
201 Phosphorylation- regulated kinase 2 (DYRK2) as one of the most highly-ranked hits (**Fig. 5B**). *DYRK2*  
202 amplification is seen in approximately 5% of HNSCC (Cancer Genome Atlas, 2015). *DYRK2* is thought  
203 to be required for tumor growth via proteasome phosphorylation (Guo et al., 2016) and induces p53-  
204 dependent apoptosis to DNA damage (Taira et al., 2007; Tandon et al., 2021). Of the *DYRK2* ORFs  
205 screened, we found greater enrichment of ORFs mapping to the isoform 2 transcript variant. To  
206 iteratively validate the role of DYRK2, we infected *p53*<sup>-/-</sup> mouse oral mucosa organoids with DYRK2  
207 isoform 2-expressing lentivirus (**Fig. 6A**). DYRK2 overexpression enhanced proliferation of *p53*<sup>-/-</sup> oral  
208 mucosa organoids versus lentivirus eGFP-infected organoids in vitro (**Fig. 6B,C**) and promoted *in vivo*  
209 tumorigenicity upon subcutaneous transplantation (**Fig. 6D,E**).

210

### 211 **FGF3 is a candidate amplified oncogenic driver in esophageal squamous cell carcinoma**

212 Results from our lentivirus pooled ORF expression screen also identified *FGF3* and *EGFR* enrichment  
213 in *p53*<sup>-/-</sup> ESCC organoids with *FGF3* having the greatest overall effect in this system; a comparatively  
214 modest enrichment was also observed for *CCND1* (**Fig. 5A**). FGF3 was lentivirally expressed in an  
215 independent ESCC *p53*<sup>-/-</sup> organoid line not used in the ORF screen (**Fig. S7A,B**), again confirming  
216 increased proliferation in serum-containing minimal F12 medium (**Fig. 7A-C**). Given the strong  
217 proliferation phenotype in the absence of the mitogen EGF, we hypothesized that FGF3  
218 overexpression could serve an EGF surrogate, and that FGF3 could act functionally as an autocrine  
219 growth factor in ESCC. Such a model was supported by our finding that FGF3 was indeed secreted  
220 into culture supernatants as confirmed by ELISA (**Fig. S7B**).

221 We then investigated if FGF3 overexpression conferred a phenotype upon subcutaneous  
222 transplantation into immunodeficient mice. Paralleling in vitro observations, FGF3 overexpression in  
223 *p53*<sup>-/-</sup> esophageal organoids induced robust tumorigenicity in vivo (**Fig. 7D-E; Fig. S7C**). We then  
224 assessed if tumor growth could be attenuated by FGFR antagonism via expression of a soluble ligand-

225 binding FGFR1 ectodomain (ECD) fused to an antibody Fc fragment (FGFR1-Fc) to scavenge  
226 secreted FGF3 (**Fig. 7F**). To this end, we utilized an adenoviral vector (Ad-FGFR1-Fc) for in vivo liver  
227 infection and hepatocyte secretion of the FGFR1-Fc ectodomain fusion protein into the circulation of  
228 mice (**Fig. 7G**). Mice infected with FGFR1-Fc adenovirus but not a control adenovirus expressing an  
229 Fc immunoglobulin fragment alone (Ad-Fc) inhibited tumor growth (**Fig. 7H-I**) in FGF3-overexpressing  
230 organoid tumors.

231 Having established tumor suppression by circulating FGFR1-Fc, we then evaluated whether  
232 selective small molecule FGFR tyrosine kinase inhibitors, a drug class efficacious in treatment of  
233 *FGFR*-rearranged tumors (Weaver and Bossaer, 2021), could also inhibit proliferation of ESCC  
234 overexpressing *FGF3*. We employed two first generation pan-FGFR inhibitors, AZD4547 and BGJ-  
235 398 and observed a clear dose dependent inhibition of *p53*<sup>-/-</sup> ESCC organoid models overexpressing  
236 FGF3 with nanomolar EC<sub>50</sub> values (**Fig. S7D**). Interestingly, this response to FGFR inhibitors was  
237 masked when organoids were cultured in EGF (data not shown) possibly due to functional redundancy  
238 between these two growth factor classes. Accordingly, AZD4547 significantly reduced growth of FGF3-  
239 overexpressing *p53*<sup>-/-</sup> esophageal organoid tumors versus vehicle (**Fig. 7J-K**). Importantly, growth of  
240 GFP tumors (i.e. without FGF3 overexpression) was not significantly different between AZD4547 and  
241 vehicle treatments (**Fig. S7E-F**). Given the importance of FGF signaling in angiogenesis, we then  
242 evaluated whether FGFR inhibition resulted in decreased tumor vasculature. FGF3-overexpressing  
243 organoid tumors observed decreased CD31<sup>+</sup> microvessel density upon AZD4547 treatment compared  
244 to vehicle (**Fig 7L,M**). Taken together, our findings support autocrine FGF-FGFR signaling as a  
245 potential druggable oncogenic mechanism in esophageal squamous tumors harboring *FGF3*  
246 amplification and overexpression.

247

248

## 249 **DISCUSSION**

250  
251 Pan-cancer bioinformatics studies of TCGA and other genome-scale cancer surveys have proven  
252 informative but lack a laboratory counterpart of functional validation in an equivalent in vitro contextual  
253 experimental system (Hahn et al., 2021). The advent of organoid technologies now powerfully enables  
254 systematic interrogation of these multi-cancer datasets in cognate pan-organoid screens matched to  
255 the tissue of origin. Here, we present a pan-cancer approach to evaluate the oncogenic potential of  
256 putative copy number alterations. First, an integrative analysis of gene expression with copy number  
257 alterations prioritized and nominated copy number outliers with potential significance in cancer biology.  
258 Second, these candidate SCNA datasets were directly coupled to functional validation in primary  
259 organoid cultures spanning colon, stomach and pancreas and three novel organoid models of oral  
260 mucosa, lung, and esophagus.

261 The present method utilized contextual modeling where SCNA outlier candidates specific to a  
262 cancer histologic type were screened in matching tissue organoids that contained a pre-existing,  
263 predominant “first hit” for that malignancy: for instance, *KRAS* mutations in PDAC, *APC* in COAD and  
264 *p53* mutation in HNSCC, ESCC, LUAD and STAD. This not only modeled the physiologic occurrence  
265 of SCNAs in the background of such pervasive signature mutations but also conveniently exploited  
266 the robust growth of such single oncogene-engineered organoids versus their wild-type counterparts  
267 to amass sufficient starting material for the barcoded screens. Further, the “bottom-up” nature of the  
268 current screens, against a minimally transformed background, conveyed potential advantages of  
269 increased sensitivity to detect oncogenic loci, versus functional testing in a patient-derived tumor  
270 organoids or cell lines where a multitude of pre-existing epi/genetic alterations could obscure effects  
271 of a given outlier candidate.

272 Copy number alterations are one of the most ubiquitous features of cancer genomes yet a  
273 comprehensive understanding of their oncogenic contributions has yet to be achieved (Kristensen et  
274 al., 2014). Earlier nominations of copy number events have primarily focused on delineating regions  
275 of loss or gain with high genomic resolution but have placed less emphasis on nominating regions of

276 functional consequence due to concomitant changes in gene expression. While chromosomal  
277 deletions involving canonical tumor suppressors or amplifications of growth factor receptor tyrosine  
278 kinases or RAS kinases are well characterized, progress to evaluate other copy number alterations  
279 have been modest. Functional genomics experiments involving immortalized cancer cell lines have  
280 identified synthetic lethality events such as *MTAP* deletion and S-adenosyl methionine arginine  
281 methyltransferase (Kryukov et al., 2016) or a recent preprint suggesting inhibition of PKMYT1 in  
282 CCNE1 amplified tumors (Gallo et al. bioRxiv 2021). Future efforts involving panels of thousands of  
283 immortalized cell lines in large scale small molecule and functional genomic experiments such as the  
284 Cancer Dependency Map have the potential to yield further insights into these copy number alterations  
285 (Boehm et al., 2021; Hahn et al., 2021). Here, we prioritized screening of amplified outliers, reasoning  
286 that oncogenic hits would be amenable to pharmacologic inhibition, but the present approaches could  
287 be extended to CRISPR/sgRNA screens for deletion outliers.

288         We identified several amplification outliers with known oncogenic potential in models of colon,  
289 pancreatic, and gastric cancer. Here, the interrogation of 121 amplification outlier ORFs from the  
290 TCGA STAD dataset in *p53<sup>R175H</sup>*-overexpressing human gastric organoids revealed the highest  
291 scoring hit as CDK6, a commonly amplified gene widely implicated in carcinogenesis and a target for  
292 pharmacological inhibition. The ability of the CDK4/6 inhibitor palbociclib to induce senescence in  
293 gastric cancer cells is reduced upon *p53* knockdown, consistent with cooperation between *p53*  
294 mutation and *CDK6* in promoting tumorigenesis (Valenzuela et al., 2017). Intriguingly, several of the  
295 top gastric cancer SCNA hits, namely *DYRK1B*, *SAMD4B*, *MRPS12*, *SIRT2*, *EIF3K*, and *PAF1*, all co-  
296 localized to chromosome 19q13.2, suggesting a multifaceted role of this amplicon in the fitness of  
297 gastric cancer cells. As amplification of chromosome 19q13.2 occurs in other cancer types including  
298 pancreas (Kuuselo et al., 2010), lung (Kim et al., 2005), and breast (Basu and Lambring, 2021;  
299 Bellacosa et al., 1995), potential cooperation between these SCNA hits warrants further investigation.

300         We also recognized and functionally validated two novel oncogenic amplifications in squamous  
301 cancers of the oral cavity and esophagus. In contrast to adenocarcinomas, squamous cancers exhibit  
302 relatively fewer actionable mutations. Here, *DYRK2* strongly promoted in vitro proliferation and in vivo

303 tumorigenicity of oral mucosal organoids, as a highly relevant model for head and neck squamous cell  
304 carcinoma. DYRK2 is a family member of relatively understudied tyrosine kinases that phosphorylate  
305 histones and other substrates (Tandon et al., 2021). Our studies suggest the potential dependency of  
306 DYRK2-amplifications in oral cancers and corresponding efficacy of DYRK2 selective inhibitors.

307 The functional validation of *FGF3* as an amplified oncogene at the 11q13 locus using *p53*<sup>-/-</sup>  
308 esophageal organoids directly suggests that this growth factor could represent an autocrine  
309 vulnerability in amplified tumors, FGFR small molecule inhibitors have recently received FDA approval  
310 in biliary and bladder cancer (Weaver and Bossaer, 2021). Our preliminary findings of in vivo and in  
311 vitro efficacy of FGFR inhibitors against FGF3-overexpressing esophageal organoids warrant further  
312 exploration and evaluation in FGF3-amplified patient derived models of ESCC as well as and other  
313 cancer types such as the copy number-driven integrative breast cancer subgroup, IntClust2, which  
314 manifests prominent FGF3 amplification (Rueda et al., 2019).

315 Notably, *EGFR* and *KRAS* amplifications confer sensitivity to inhibitors targeting corresponding  
316 pathways in cancer patients (Catenacci et al., 2021; Wong et al., 2018). In addition, FGF3 is an  
317 embryonal FGF and is not significantly expressed in adult human tissues; thus FGF3 could be  
318 considered an oncofetal antigen susceptible to adoptive T cell therapies selective for cells presenting  
319 FGF3 peptides on class I MHC. Given that more than 40% of ESCC harbor FGF3 amplifications within  
320 the 11q13 amplicon (Cancer Genome Atlas Research et al., 2017), successful targeting of FGF3 in  
321 ESCC could have significant clinical impact (Abnet et al., 2018). However, whether these patients may  
322 respond to FGFR inhibition requires further study, as other likely driver loci such as *CCND1* are co-  
323 amplified with *FGF3* at 11q13, although in our screen *FGF3* displayed stronger effects than *CCND1*.  
324 Nevertheless, our data identify *FGF3* as an additional driver at this locus which could indeed cooperate  
325 with *CCND1*.

326 Overall, we have demonstrated that primary organoid culture can be robustly applied to  
327 validate pan-cancer genomic datasets in pooled barcoded screening formats, using amplified outlier  
328 loci as proof-of-principle. However, there are several limitations to the present study. First, the usage  
329 of cDNA ORFs in lentiviral vectors is subject to inherent packaging limits where candidate genes

330 associated with large inserts may not be feasibly generated with sufficient titer. Furthermore, achieving  
331 uniform library representation via titrating and pooling arrayed lentiviral preps may be cumbersome  
332 and costly. Desired full-length cDNAs either may not be available or may not represent the correct  
333 isoform in the tissue specific context of a given organoid model, precluding evaluation of given loci.  
334 Future efforts could adapt this pan-cancer organoid framework to utilize CRISPR activation or  
335 CRISPRon where dCas9 is fused to transcriptional activators such as VPR or to histone demethylases  
336 (Gilbert et al., 2014; Horlbeck et al., 2016; Nunez et al., 2021). Lastly, the use of exclusively human  
337 organoid models and progressively miniaturized formats (Du et al., 2020) could be combined with  
338 systematic functional evaluation of additional tissue organoid types, genomic regions and classes of  
339 genetic alterations.

340

341

#### 342 **ACKNOWLEDGEMENTS**

343 We thank members of the Kuo laboratory and the CTD<sup>2</sup> consortium for helpful discussions. We thank  
344 Scott Younger for supervising the design and construction of lentiviral library pools. This work was  
345 supported by the NCI Cancer Target Discovery and Development (CTD2) Network (U01CA217851,  
346 C.J.K and C.C.; U01CA176058, W.C.H.), Support was also provided by NIH U54CA224081, NIH  
347 U01CA199241, Emerson Collective, Ludwig Cancer Research and Stand Up To Cancer to C.J.K. This  
348 manuscript is dedicated to the memories of Dr. Daniela Gerhard and Dr. Kenneth Scott.

#### 349 **DECLARATION OF INTERESTS**

350 A.A.S. has served as a consultant for Boehringer Ingelheim, Pharmacosmos, and is employed at  
351 Tempus Labs and the University of Illinois. C.J.K., is a scientific advisory board member for Surrozen,  
352 Inc., Mozart Therapeutics and NextVivo. C.C. has served as a scientific advisory board  
353 member/consultant for Genentech, Grail, DeepCell, Nanostring and Viosera. W.C.H. is a consultant  
354 for Thermo Fisher, Solasta Ventures, MPM Capital, Tyra Biosciences, iTeos, Frontier Medicines,  
355 Function Oncology, KSQ Therapeutics, Jubilant Therapeutics, RAPPTA Therapeutics, and Paraxel.

## 356 **STAR Methods**

### 357 **Lead Contact and Resource Availability**

358

359 Further information and requests for resources and reagents should be directed to and will be  
360 fulfilled by the Lead Contact, Calvin J. Kuo ([cjkuo@stanford.edu](mailto:cjkuo@stanford.edu)).

361

### 362 **Data and Code Availability**

363

364 Code for Outlier Analysis and screening analysis will be made available in a Github repository  
365 upon publication of this manuscript.

366 Outlier screening data will be deposited at the CTD<sup>2</sup> portal upon publication of this manuscript:  
367 (<https://ocg.cancer.gov/programs/ctd2/data-portal>)

368

## 369 **EXPERIMENTAL MODEL AND SUBJECT DETAILS**

### 370 **Human specimens**

371 Normal tissues were obtained through the Stanford Tissue Bank from patients undergoing  
372 surgical resection at Stanford Health Care (SHC) All experiments utilizing human material were  
373 approved by the SHC Institutional Review Board and performed under protocols #28908. Written  
374 informed consent for research was obtained from donors prior to tissue acquisition. Analysis of  
375 influence of gender identity upon experiments was not performed.

### 376 **Mouse Models**

377 Female C57BL/6 mice or NOG-E mice were used for organoid model generation and  
378 subcutaneous tumor implantation (mice were obtained from Taconic Biosciences) in accordance  
379 with NIH and Stanford Administrative Panel on Laboratory animal Care (APLAC). Mice were  
380 housed in pairs and used for experimentation at 4-8 weeks of age. Animals were maintained on  
381 a 12-hour light/dark cycle, in a temperature- and humidity-controlled room with food and water.  
382

## 383 **METHOD DETAILS**

### 384 **Computational amplified/upregulated outlier analysis**

385 TCGA expression data (rsem genes normalized rna-seq) and copy number data (hg19 nocnv) were  
386 downloaded for lung adenocarcinoma (LUAD), esophageal carcinoma (ESCA, filtered to retain only  
387 the squamous samples), head and neck squamous carcinoma (HNSC), pancreatic adenocarcinoma  
388 (PAAD), colon adenocarcinoma (COAD) and stomach adenocarcinoma (STAD) from Firehose  
389 (<http://gdac.broadinstitute.org/>). We considered a segment amplified if the segment value was higher  
390 than the median value of all segments of the sample plus six times the standard deviation of the central  
391 quantiles of the values of the sample (0.25-0.75). Amplified segments were matched with the position  
392 of the gene (hg19) to assign gene-level values. For gene expression data, values were normalized  
393 using a log<sub>2</sub> (adding a unit to the original count) transformation. We generated, for each gene a  
394 theoretical normal distribution, and obtained the 5% and 95% threshold quantiles where samples with  
395 real values higher than the 95% were considered *upregulated* expression outliers. Finally, we called a  
396 given gene an outlier if was simultaneously *amplified* and an *upregulated* expression outlier following

397 the approach from (Curtis et al. Nature 2012). Outlier distributions were plotted with the ggbio package,  
398 transitions across genes were smoothed using the smooth.spline function.

399

#### 400 **Organoid derivation and culture**

401 Mouse esophagus, tongue/oral mucosa and pancreas were dissected from 6–8-week-old  $p53^{flox/flox}$   
402 mice and mouse peripheral lung from 6–8-week-old  $LSL-Kras^{G12D}; p53^{flox/flox}$  mice (Hingorani et al.,  
403 2003; Jackson et al., 2005) and minced into small pieces. Minced tissues were embedded in collagen  
404 gel in air-liquid interface (ALI) (Li et al., 2014; Nadauld et al., 2014).  $2 \times 10^8$  pfu adenovirus Ad-Fc or  
405 Ad-Cre-GFP (University of Iowa Vector Core) per 500  $\mu$ l medium were added on top of the inner dish  
406 collagen I (Wako) to activate  $Kras^{G12D}$  expression and delete  $p53$ . Established organoids were  
407 maintained in ALI. Culture medium for mouse oral mucosa, esophagus and lung organoids was  
408 advanced DMEM/F12 supplemented with 1 mM HEPES, 10 mM nicotinamide, Glutamax, 1 mM N-  
409 acetylcysteine, B27, 0.5  $\mu$ M A83-01, PSQ, 50 ng/ml recombinant human EGF, 100 ng/ml recombinant  
410 human NOGGIN. Pancreas organoids were cultured in WENR media (see below).

411 Human gastric and colon organoids were generated from deidentified surgical specimens from  
412 Stanford Hospital under an approved IRB protocol following established methods and grown in a  
413 submerged format in WENR media (Matano et al., 2015; Sato et al., 2011) in BME-2 extracellular  
414 matrix (R&D Systems) (Lo et al., 2021; Salahudeen et al., 2020).

415 The R175H mutant of  $p53$  was transduced by lentivirus into wild type human gastric organoids  
416 APC null colon organoids were generated as previously described (Lo et al., 2021; Matano et al., 2015;  
417 Sato et al., 2011). For DYRK2 validation experiments, lentiviral DYRK2 (TRCN489007, Broad ORF)  
418 was infected into  $p53$ -null mouse oral mucosa organoids in log phase using spinfection (Lo et al.,  
419 2021; Salahudeen et al., 2020).

420

#### 421 **Tissue contextual pooled screening of putative outlier genes**

422 Organoids were either removed from matrix with either TrypLE or collagenase type IV as previously  
423 described (Lo et al., 2021; Neal et al., 2018). Upon matrix removal, organoids were further digested  
424 into single cell suspensions with TrypLE for 20 minutes at 37 degrees Celsius. Cells were centrifuged  
425 at 600 x g for 3 minutes, then washed and incubated with 100 Kunitz Units DNase I in 1 ml of Advanced  
426 DMEM/F12 for 15 minutes at room temperature. Cells were then counted and 1000 cells per ORF  
427 construct were infected via spinfection as four technical replicates. Each technical replicate was  
428 resuspended in complete culture media + 8  $\mu$ g/ml polybrene, plus pooled lentivirus library with equal  
429 weighting inclusive of negative controls (MOI = 0.8) to a total volume of 250  $\mu$ L per replicate in a 48  
430 well plate. Plates were centrifuged for 1 hour at 32 degrees Celsius at 600 x g, then allowed to recover  
431 for 4-6 hours at 37 degrees in a cell incubator. Spinoculated cells were then plated in ECM/Matrigel at  
432 100,000 cells per 50  $\mu$ l droplet in complete media. Each technical replicate was cultured separately  
433 including subsequent passaging and gDNA harvesting. Each replicate was allowed to grow for 96  
434 hours and then transferred either to ALI or maintained in ECM per above culture conditions. After 96  
435 hours, cultures were then subjected to puromycin selection at  $IC_{90}$  concentrations established by prior  
436 dose response studies. After 96 hours of puromycin selection, the cultures were digested into single  
437 cell suspensions and half the biomass was snap frozen as a representation of the initial screen  
438 timepoint. Cultures were then passaged serially upon confluence as previously described (Lo et al.,  
439 2021; Neal et al., 2018) and screens were terminated after the fourth passage.

440

#### 441 **Barcode Amplification and Deep Sequencing**

442 Snap frozen cell pellets were extracted with DNeasy (Qiagen) following the manufacturer's protocol.  
443 10 $\mu$ g of genomic DNA was subjected to a one step PCR strategy per the Broad Genomic Perturbation  
444 Platform protocol (<https://portals.broadinstitute.org/gpp/public/resources/protocols>). Briefly, a pool of  
445 Illumina P5 primers were pooled and combined with a barcode library specific library primer. PCR  
446 products were gel extracted and subjected to Bioanalyzer analysis to assess for sample purity and  
447 quantified by Qubit. Samples were then pooled and Deep Sequencing was performed on an Illumina  
448 MiSeq instrument configured 300 | 8 | 0 | 300 bp with Nextera XT format.

449



450 Fastq files were processed using the R package ShortRead (Morgan et al., 2009) and ORF barcodes  
451 were counted as a DNASTringSet from the BioString R package (H. Pagès, 2021), and reverse  
452 barcodes were counted using the reverseComplement function. Barcodes (both forward and reverse)  
453 were counted using the vcountPattern function with an error limit of one single mismatch in forward  
454 and reverse strand reads combined.

455  
456

### 457 **ORF enrichment analysis**

458 The proportion of barcodes for each gene/sample were calculated by dividing the barcode counts by  
459 the total read counts of the NGS library. We then calculated the ratio of enrichment for each gene by  
460 dividing the proportion of barcodes at the terminal timepoint by the proportion of barcodes at the  
461 initial timepoint. In order to avoid division by zero, genes were filtered for any sample proportions  
462 less than 0.0003. Barcodes were plotted in rank order by genes with the median value of the ratio,  
463 separating the controls from the putative drivers.

464

### 465 **Immunoblotting**

466 Lysate preparation and immunoblot analyses were performed using standard methods. Briefly, cells  
467 were harvested in RIPA buffer containing protease inhibitor cocktail (cOmplete Mini, Roche) and  
468 centrifuged at 5000 × g for 10 min to remove debris. Protein concentration was assessed using BCA  
469 Kit (Bio-Rad). Samples were supplemented with SDS sample buffer containing 5% 2-  
470 mercaptomethanol and 100 mM DTT. NuPAGE 4%–12% Bis-Tris Gels (ThermoFisher Scientific) were  
471 used for SDS-PAGE, then transferred to PVDF membranes (EMD Millipore). Membranes were  
472 blocked with 5% non-fat dry milk in TBS/0.05% Triton-X (TBST/milk). Membranes were incubated with  
473 primary antibodies: anti-DYRK2 antibody (#8143, Cell Signaling) and anti-GAPDH (#5174, Cell  
474 Signaling) diluted in TBST/milk overnight at 4°C. HRP-conjugated anti-Rabbit IgG (H+L) antibody  
475 (111-035-003, Jackson ImmunoResearch) were incubated for 1h at room temperature. Bound  
476 antibodies were visualized using SuperSignal West Pico Chemiluminescent Substrates  
477 (ThermoFisher Scientific) and exposure of AccuRay Blue X-Ray Films (E&K Scientific).

478

### 479 **qRT-PCR**

480 Total RNA was isolated from cells using RNeasy (QIAGEN) and cDNA was synthesized using iScript  
481 Reverse Transcription Supermix (Bio-Rad). RT-qPCR was performed with Power SYBR Green assay  
482 (Applied Biosystems). Relative RNA expression was calculated using standard curve method and  
483 normalized by *Gapdh*.

484

### 485 **Proliferation assays and in vitro small molecule studies**

486 Organoids were dissociated into single cells. 5000 cells were plated with 5-10 µl of Matrigel in flat-  
487 bottom 96 well plate or 10 µl of collagen in round-bottom 96 well plate. 10% AlamarBlue was added  
488 to wells and incubated for 4 hours at 37°C at indicated days. Fluorescence (Ex/Em=530/590 nm) was  
489 measured in a Biotek plate reader according to the manufacturer's protocols. Small molecule  
490 treatments were carried out as dose response studies in triplicate 72 hours after seeding.

491

### 492 **Immunofluorescence staining**

493 Paraffin-embedded sections were incubated in citrate antigen retrieval solution and blocked with 10%  
494 normal donkey serum. Sections were incubated with the following primary antibodies: mouse anti-E-  
495 cadherin (BD610182, BD Biosciences), Alexa Fluor 647-labeled anti-KRT5 (ab193895, Abcam), rat-  
496 anti-Ki67 (14-5698-82, eBioscience) overnight at 4°C. Sections were washed and subsequently  
497 incubated with the following secondary antibodies: Cy3-conjugated Affinipure goat anti-mouse IgG  
498 (H+L) (115-165-062, Jackson ImmunoResearch), Cy3-conjugated Affinipure goat anti-rat IgG (H+L)  
499 (112-165-167, Jackson ImmunoResearch). Sections were washed and mounted with Fluoro-Gel II  
500 with DAPI (Cat. 17985-50, Electron microscopy sciences). Sections were imaged by a Zeiss Axio-  
501 Imager Z1 with ApoTome attachment or a Leica SP6 inverted confocal microscope as previously  
502 described (Salahudeen et al., 2020).

503  
504  
505  
506  
507  
508  
509  
510  
511  
512  
513  
514  
515  
516  
517  
518  
519  
520  
521  
522  
523  
524  
525  
526  
527  
528  
529  
530  
531  
532  
533  
534  
535  
536  
537  
538  
539  
540  
541  
542  
543  
544  
545  
546

### **In vivo organoid transplantation**

All animal experimental procedures were approved by an IACUC protocol. Subcutaneous transplantations were performed in NOG-E mice (Taconic) as previously described (Li et al., 2014). Briefly, organoid cells were dissociated into single cell suspensions and mixed in 100  $\mu$ l of Matrigel and  $10^5$ - $10^6$  cells were subcutaneously injected into the flank. Tumor formation was assessed by palpation and tumors were measured by digital calipers for length, width, and height and ellipsoid volumes were calculated as previously described (Li et al., 2014). Animals were euthanized at predefined endpoints or morbidity criteria and tumor and tissue samples were freshly fixed in formalin and embedded in paraffin.

### **In vivo adenoviral injection**

$10^5$  FGF3 expressing  $p53^{-/-}$  esophageal organoid cells were subcutaneously implanted as above in 20 mice. Mice were monitored for serial tumor measurement and mice with measurable tumors were randomized to achieve a mean of 100 mm<sup>3</sup> tumor volume.  $5 \times 10^8$  pfu of adenovirus expressing FGFR1-ECD-Fc, encoding the soluble extracellular ligand-binding domain of human FGFR1 fused to C-terminal mouse IgG2 $\alpha$  Fc (Ad FGFR1-ECD-Fc), or control adenovirus expressing mouse IgG2 $\alpha$  Fc (Ad Fc) was injected i.v. retroorbitally and serum was analyzed by Western blot for expression of FGFR1-ECD-Fc or Fc using anti-IgG2 $\alpha$  Fc (Jackson ImmunoResearch). All adenoviral inserts were cloned into the E1 region of E1<sup>-</sup>E3<sup>-</sup> Ad strain 5 by homologous recombination and amplified in 293 cells followed by CsCl<sub>2</sub> gradient purification of virus, as previously described. (Chang et al., 2017; Kuhnert et al., 2010; Kuo et al., 2001; Yan et al., 2017).

### **FGF3 ELISA**

Organoid conditioned media from log phase growth GFP or FGF3 expressing  $p53^{-/-}$  esophageal organoid cells were assessed according to the manufacturer's protocol (Aviva Biosciences catalog # OKEH02512).

### **In vivo treatment with AZD4547**

Mice with subcutaneously either FGF3 or GFP expressing  $p53^{-/-}$  esophageal organoid cells and tumor volumes were serially measured and mice were randomized as above. Mice were treated with either an oral suspension of AZD4547 or vehicle daily as previously described (Gavine et al., 2012) and tumors were serially measured as above.

### **Quantitation of CD31+ microvessel density**

Immunohistochemistry for CD31 (MAB1398Z, EMD Millipore) was performed on 5  $\mu$ m FFPE tissue sections using Proteinase K antigen retrieval as described (Fairweather et al., 2015). Microvessel density was scored using the Chalkley method as previously described (Fox et al., 1995; Vermeulen et al., 2002). Briefly, FFPE sections of mouse tumors from FGF3 expressing  $p53^{-/-}$  esophageal organoid subcutaneous transplants were subjected to CD31 IHC staining. The mean of three CD31+ hotspots at 20X magnification were scored on the overlap of 25 random points on an ocular grid.

547 **FIGURE LEGENDS**

548

549 **Figure 1. Overview of integrative analysis for expression and copy number amplification events**  
550 **as pan-cancer outliers.**

- 551 A) Schematic of integrative analysis to nominate outlier gene candidates.  
552 B) Genomic landscape of selected TCGA esophageal squamous cell carcinoma outliers.  
553 C) Genomic landscape of selected TCGA head and neck squamous cell carcinoma outliers.  
554 D) Genomic landscape of selected TCGA colon adenocarcinoma outliers.  
555 E) Genomic landscape of selected TCGA pancreatic ductal adenocarcinoma outliers.  
556 F) Genomic landscape of selected TCGA NSCLC adenocarcinoma outliers.  
557 G) Genomic landscape of selected TCGA stomach adenocarcinoma outliers.

558

559 **Figure 2. Generation and characterization of  $p53^{-/-}$  mouse oral mucosa organoids.**

560 A-B) WT (A) and  $p53^{-/-}$  mouse oral mucosa organoids (B) cultured in ALI for 34 days. Scale bar:  
561 brightfield; 500  $\mu\text{m}$  (left top panel), H&E staining; 100  $\mu\text{m}$  (right top panel), IF staining; 50  $\mu\text{m}$   
562 (bottom panels).

563 C) Organoid morphology of WT (top panel) and  $p53^{-/-}$  mouse oral mucosa organoids (bottom panel)  
564 cultured in ALI for 7 days. Scale bar: 200  $\mu\text{m}$ .

565 D) Proliferation of oral mucosa  $p53^{-/-}$  and WT organoids in ALI culture as assessed by resazurin  
566 reduction.

567 E) Expression of  $p53$ ,  $Ki67$  and  $Cdkn1a$ , as assessed by RT-qPCR, in  $p53^{-/-}$  versus WT mouse oral  
568 mucosa organoids in ALI.

569 F) Tumor formation of  $p53^{-/-}$  mouse oral mucosa organoids 7 months after implantation  
570 (WT; n=3,  $p53^{-/-}$ ; n=3).

571 G) Primary tumor of  $p53^{-/-}$  mouse oral mucosa organoids from F, scale bar: 100  $\mu\text{m}$ .

572 H) Lung metastasis of  $p53^{-/-}$  mouse oral mucosa organoids from F, scale bar: 100  $\mu\text{m}$ .

573

574

575 **Figure 3. Generation and characterization of  $p53^{-/-}$  mouse esophageal squamous cell carcinoma**  
576 **organoids.**

577 A) Stereomicroscope images of wild-type esophageal organoids. Scale bar = 2.5 mm.

578 B) Brightfield of wild type esophageal organoids. Scale bar = 250  $\mu$ m.

579 C) H&E staining of wild-type esophageal organoids. Scale bar = 250 micron.

580 D) H&E staining of  $p53^{-/-}$  esophageal organoids. Scale bar = 250 micron.

581 E) KRT5 Immunofluorescence of (D).

582 F) qRT-PCR of  $p53$  in Ad-Fc or Ad-Cre GFP infected  $p53^{fllox/fllox}$  esophageal organoids.

583 G) Subcutaneous tumor formation 6 months post-implantation of  $p53^{-/-}$  esophageal organoids.

584 H) H&E stain of (G), scale bar = 250  $\mu$ m.

585

586 **Figure 4. Generation and characterization of  $Kras^{G12D} p53^{-/-}$  lung adenocarcinoma organoids.**

587 A) Microscopy of  $Kras^{G12D}; p53^{-/-}$  lung organoids with and without activation of latent alleles. Left,  
588 Stereomicroscopy of organoids at d28, Middle, phase contrast microscopy of organoids at d28,  
589 Right, H&E staining of organoid cultures at day 28. Scale bars = 3 mm, 250  $\mu$ m, and 250  $\mu$ m  
590 respectively.

591 B) Sanger sequencing of  $Kras$  cDNA upon activation of latent LSL  $Kras^{G12D}$  from (A).

592 C) qRT-PCR of  $p53$  in Ad-Fc or Ad-Cre GFP infected  $Kras^{G12D}, p53^{-/-}$  lung organoids.

593 D) TTF-1 immunofluorescence of  $Kras^{G12D}, p53^{-/-}$  lung organoids, scale bar = 250 microns.

594 E-G) H&E of primary tumor, high magnification, and lung metastasis 8 weeks post-s.c. implantation of  
595  $Kras^{G12D}, p53^{-/-}$  lung organoids. Scale bars = 500, 100 and 500 microns, respectively.

596

597

598

599

600 **Figure 5. Screening pan-cancer candidate amplification outliers in organoids with**  
601 **corresponding tissue context.**

602 A-F) Barcode ratios of terminal:initial timepoints demonstrating relative enrichments from pooled  
603 lentiviral ORF screens. Boxplots represent four technical replicates with the exception of F) which was  
604 performed with two technical replicates.

605  
606 **Figure 6. DYRK2 overexpression induces proliferation and tumorigenicity of  $p53^{-/-}$  mouse oral**  
607 **mucosa organoids.**

608 A) Validation of DYRK2 overexpression by immunoblotting (left panel) and qRT-PCR (right panel).

609 B) Morphology of  $p53^{-/-}$  eGFP and  $p53^{-/-}$  DYRK2 organoids cultured in ALI for 14 days. Scale bar:  
610 bright field; 500  $\mu\text{m}$  (top panel), H&E staining; 100  $\mu\text{m}$  (bottom panel).

611 C) Proliferation of  $p53^{-/-}$  eGFP and  $p53^{-/-}$  DYRK2 in ALI as assessed by resazurin reduction.

612 D) Tumor volume of  $p53^{-/-}$  eGFP and  $p53^{-/-}$  DYRK2 ( $p53^{-/-}$  eGFP; n=6,  $p53^{-/-}$  DYRK2; n=7). Data  
613 represent mean  $\pm$  SEM. Two-sided P-values were calculated by Student's t-test. \*p < 0.05,  
614 \*\* p < 0.01.

615 E) H&E staining of  $p53^{-/-}$  eGFP and  $p53^{-/-}$  DYRK2 tumors. Scale bar: 100  $\mu\text{m}$ .

616  
617 **Figure 7. Iterative validation of FGF3 amplification as an oncogenic driver in  $p53^{-/-}$  mouse**  
618 **esophageal squamous organoids.**

619 A) Multicolor immunofluorescence of  $p53^{-/-}$  esophageal organoids with lentiviral expression of FGF3  
620 with a C-terminal V5 tag.

621 B) Multicolor immunofluorescence of  $p53^{-/-}$  esophageal organoids with lentiviral expression of GFP  
622 with a C-terminal V5 tag.

623 C) in vitro proliferation of FGF3 versus GFP-expressing  $p53^{-/-}$  esophageal organoids by resazurin  
624 reduction.

- 625 D) in vivo tumor formation and growth upon subcutaneous transplantation of FGF3- versus GFP-  
626 expressing p53<sup>-/-</sup> esophageal organoids in immunodeficient NOG mice. Each group has n = 10  
627 biological replicates.
- 628 E) Multicolor immunofluorescence of FGF3 p53<sup>-/-</sup> esophageal organoid subcutaneous tumor sections.
- 629 F) Schematic of hypothesized autocrine mechanism of FGF3 driven oncogenesis and potential  
630 disruption by a soluble ligand-binding extracellular domain of FGFR1.
- 631 G) Anti-Fc immunoblot showing serum expression of FGFR1-Fc or Fc alone at 2 days after i.v.  
632 injection of immunodeficient NSG mice infected with the corresponding recombinant  
633 adenoviruses.
- 634 H) Serial measurements of subcutaneous tumor growth subsequent to adenoviral infection of FGFR1  
635 ECD-Fc versus Fc controls in FGF3 expressing p53<sup>-/-</sup> esophageal organoid subcutaneous tumors.  
636 Each group has n = 6 biological replicates.
- 637 I) Terminal tumor weights of H,  $P = 0.026$ .
- 638 J) Serial measurements of subcutaneous tumor growth subsequent to daily administration of vehicle  
639 or the FGFR inhibitor AZD4547. Each group has n = 10 biological replicates.
- 640 K) Terminal tumor weights of J,  $P = 0.00057$ .
- 641 L) Representative CD31 immunohistochemistry staining of subcutaneous tumors from J. Scale bar =  
642 200  $\mu\text{m}$ .
- 643 M) Chalkley quantitation of CD31+ microvessel density in (L),  $P = 0.001$ . Each group had three  
644 technical replicates for each biological replicate.
- 645

646 **REFERENCES**

647

648 Abnet, C.C., Arnold, M., and Wei, W.Q. (2018). Epidemiology of Esophageal Squamous Cell  
649 Carcinoma. *Gastroenterology* 154, 360-373.

650 Basu, A., and Lambring, C.B. (2021). Akt Isoforms: A Family Affair in Breast Cancer. *Cancers*  
651 (Basel) 13.

652 Bellacosa, A., de Feo, D., Godwin, A.K., Bell, D.W., Cheng, J.Q., Altomare, D.A., Wan, M.,  
653 Dubeau, L., Scambia, G., Masciullo, V., *et al.* (1995). Molecular alterations of the AKT2  
654 oncogene in ovarian and breast carcinomas. *Int J Cancer* 64, 280-285.

655 Beroukhi, R., Mermel, C.H., Porter, D., Wei, G., Raychaudhuri, S., Donovan, J., Barretina,  
656 J., Boehm, J.S., Dobson, J., Urashima, M., *et al.* (2010). The landscape of somatic copy-  
657 number alteration across human cancers. *Nature* 463, 899-905.

658 Boehm, J.S., Garnett, M.J., Adams, D.J., Francies, H.E., Golub, T.R., Hahn, W.C., Iorio, F.,  
659 McFarland, J.M., Parts, L., and Vazquez, F. (2021). Cancer research needs a better  
660 map. *Nature* 589, 514-516.

661 Broutier, L., Mastrogianni, G., Verstegen, M.M., Francies, H.E., Gavarro, L.M., Bradshaw,  
662 C.R., Allen, G.E., Arnes-Benito, R., Sidorova, O., Gaspersz, M.P., *et al.* (2017). Human  
663 primary liver cancer-derived organoid cultures for disease modeling and drug screening.  
664 *Nat Med* 23, 1424-1435.

665 Cancer Genome Atlas, N. (2015). Comprehensive genomic characterization of head and neck  
666 squamous cell carcinomas. *Nature* 517, 576-582.

667 Cancer Genome Atlas Research, N., Analysis Working Group: Asan, U., Agency, B.C.C.,  
668 Brigham, Women's, H., Broad, I., Brown, U., Case Western Reserve, U., Dana-Farber  
669 Cancer, I., Duke, U., *et al.* (2017). Integrated genomic characterization of oesophageal  
670 carcinoma. *Nature* 541, 169-175.

671 Catenacci, D.V.T., Moya, S., Lomnicki, S., Chase, L.M., Peterson, B.F., Reizine, N., Alpert,  
672 L., Setia, N., Xiao, S.Y., Hart, J., *et al.* (2021). Personalized Antibodies for  
673 Gastroesophageal Adenocarcinoma (PANGEA): A Phase II Study Evaluating an  
674 Individualized Treatment Strategy for Metastatic Disease. *Cancer Discov* 11, 308-325.

675 Chang, J., Mancuso, M.R., Maier, C., Liang, X., Yuki, K., Yang, L., Kwong, J.W., Wang, J.,  
676 Rao, V., Vallon, M., *et al.* (2017). Gpr124 is essential for blood-brain barrier integrity in  
677 central nervous system disease. *Nat Med* 23, 450-460.

- 678 Curtis, C., Shah, S.P., Chin, S.F., Turashvili, G., Rueda, O.M., Dunning, M.J., Speed, D.,  
679 Lynch, A.G., Samarajiwa, S., Yuan, Y., *et al.* (2012). The genomic and transcriptomic  
680 architecture of 2,000 breast tumours reveals novel subgroups. *Nature* 486, 346-352.
- 681 Drost, J., van Jaarsveld, R.H., Ponsioen, B., Zimmerlin, C., van Boxtel, R., Buijs, A., Sachs,  
682 N., Overmeer, R.M., Offerhaus, G.J., Begthel, H., *et al.* (2015). Sequential cancer  
683 mutations in cultured human intestinal stem cells. *Nature* 521, 43-47.
- 684 Du, Y., Li, X., Niu, Q., Mo, X., Qui, M., Ma, T., Kuo, C.J., and Fu, H. (2020). Development of  
685 a miniaturized 3D organoid culture platform for ultra-high-throughput screening. *J Mol*  
686 *Cell Biol* 12, 630-643.
- 687 Ebrahimi, M., and Botelho, M. (2017). Adult Stem Cells of Orofacial Origin: Current Knowledge  
688 and Limitation and Future Trend in Regenerative Medicine. *Tissue Eng Regen Med* 14,  
689 719-733.
- 690 Fairweather, M., Heit, Y.I., Buie, J., Rosenberg, L.M., Briggs, A., Orgill, D.P., and Bertagnolli,  
691 M.M. (2015). Celecoxib inhibits early cutaneous wound healing. *J Surg Res* 194, 717-  
692 724.
- 693 Fox, S.B., Leek, R.D., Weekes, M.P., Whitehouse, R.M., Gatter, K.C., and Harris, A.L. (1995).  
694 Quantitation and prognostic value of breast cancer angiogenesis: comparison of  
695 microvessel density, Chalkley count, and computer image analysis. *J Pathol* 177, 275-  
696 283.
- 697 Francies, H.E., Barthorpe, A., McLaren-Douglas, A., Barendt, W.J., and Garnett, M.J. (2019).  
698 Drug Sensitivity Assays of Human Cancer Organoid Cultures. *Methods Mol Biol* 1576,  
699 339-351.
- 700 Gavine, P.R., Mooney, L., Kilgour, E., Thomas, A.P., Al-Kadhimi, K., Beck, S., Rooney, C.,  
701 Coleman, T., Baker, D., Mellor, M.J., *et al.* (2012). AZD4547: an orally bioavailable,  
702 potent, and selective inhibitor of the fibroblast growth factor receptor tyrosine kinase  
703 family. *Cancer Res* 72, 2045-2056.
- 704 Gilbert, L.A., Horlbeck, M.A., Adamson, B., Villalta, J.E., Chen, Y., Whitehead, E.H.,  
705 Guimaraes, C., Panning, B., Ploegh, H.L., Bassik, M.C., *et al.* (2014). Genome-Scale  
706 CRISPR-Mediated Control of Gene Repression and Activation. *Cell* 159, 647-661.
- 707 Guo, X., Wang, X., Wang, Z., Banerjee, S., Yang, J., Huang, L., and Dixon, J.E. (2016). Site-  
708 specific proteasome phosphorylation controls cell proliferation and tumorigenesis. *Nat*  
709 *Cell Biol* 18, 202-212.



- 710 H. Pagès, P.A., R. Gentleman, and S. DebRoy. (2021). Biostrings: Efficient manipulation of  
711 biological strings. R package version 2.60.2.
- 712 Hahn, W.C., Bader, J.S., Braun, T.P., Califano, A., Clemons, P.A., Druker, B.J., Ewald, A.J.,  
713 Fu, H., Jagu, S., Kemp, C.J., *et al.* (2021). An expanded universe of cancer targets. *Cell*  
714 *184*, 1142-1155.
- 715 Hingorani, S.R., Petricoin, E.F., Maitra, A., Rajapakse, V., King, C., Jacobetz, M.A., Ross, S.,  
716 Conrads, T.P., Veenstra, T.D., Hitt, B.A., *et al.* (2003). Preinvasive and invasive ductal  
717 pancreatic cancer and its early detection in the mouse. *Cancer Cell* *4*, 437-450.
- 718 Horlbeck, M.A., Gilbert, L.A., Villalta, J.E., Adamson, B., Pak, R.A., Chen, Y., Fields, A.P.,  
719 Park, C.Y., Corn, J.E., Kampmann, M., *et al.* (2016). Compact and highly active next-  
720 generation libraries for CRISPR-mediated gene repression and activation. *Elife* *5*.
- 721 Huang, L., Holtzinger, A., Jagan, I., BeGora, M., Lohse, I., Ngai, N., Nostro, C., Wang, R.,  
722 Muthuswamy, L.B., Crawford, H.C., *et al.* (2015). Ductal pancreatic cancer modeling and  
723 drug screening using human pluripotent stem cell- and patient-derived tumor organoids.  
724 *Nat Med* *21*, 1364-1371.
- 725 Jackson, E.L., Olive, K.P., Tuveson, D.A., Bronson, R., Crowley, D., Brown, M., and Jacks,  
726 T. (2005). The differential effects of mutant p53 alleles on advanced murine lung cancer.  
727 *Cancer Res* *65*, 10280-10288.
- 728 Jones, K.B., Furukawa, S., Marangoni, P., Ma, H., Pinkard, H., D'Urso, R., Zilionis, R., Klein,  
729 A.M., and Klein, O.D. (2019). Quantitative Clonal Analysis and Single-Cell  
730 Transcriptomics Reveal Division Kinetics, Hierarchy, and Fate of Oral Epithelial  
731 Progenitor Cells. *Cell Stem Cell* *24*, 183-192 e188.
- 732 Kim, T.M., Yim, S.H., Lee, J.S., Kwon, M.S., Ryu, J.W., Kang, H.M., Fiegler, H., Carter, N.P.,  
733 and Chung, Y.J. (2005). Genome-wide screening of genomic alterations and their  
734 clinicopathologic implications in non-small cell lung cancers. *Clin Cancer Res* *11*, 8235-  
735 8242.
- 736 Kristensen, V.N., Lingjaerde, O.C., Russnes, H.G., Vollan, H.K., Frigessi, A., and Borresen-  
737 Dale, A.L. (2014). Principles and methods of integrative genomic analyses in cancer. *Nat*  
738 *Rev Cancer* *14*, 299-313.
- 739 Kryukov, G.V., Wilson, F.H., Ruth, J.R., Paulk, J., Tsherniak, A., Marlow, S.E., Vazquez, F.,  
740 Weir, B.A., Fitzgerald, M.E., Tanaka, M., *et al.* (2016). MTAP deletion confers enhanced  
741 dependency on the PRMT5 arginine methyltransferase in cancer cells. *Science* *351*,  
742 1214-1218.

- 743 Kuhnert, F., Mancuso, M.R., Shamloo, A., Wang, H.T., Choksi, V., Florek, M., Su, H., Fruttiger,  
744 M., Young, W.L., Heilshorn, S.C., *et al.* (2010). Essential regulation of CNS angiogenesis  
745 by the orphan G protein-coupled receptor GPR124. *Science* 330, 985-989.
- 746 Kuo, C.J., Farnebo, F., Yu, E.Y., Christofferson, R., Swearingen, R.A., Carter, R., von Recum,  
747 H.A., Yuan, J., Kamihara, J., Flynn, E., *et al.* (2001). Comparative evaluation of the  
748 antitumor activity of antiangiogenic proteins delivered by gene transfer. *Proc Natl Acad*  
749 *Sci U S A* 98, 4605-4610.
- 750 Kuuselo, R., Simon, R., Karhu, R., Tennstedt, P., Marx, A.H., Izicki, J.R., Yekebas, E.,  
751 Sauter, G., and Kallioniemi, A. (2010). 19q13 amplification is associated with high grade  
752 and stage in pancreatic cancer. *Genes Chromosomes Cancer* 49, 569-575.
- 753 Li, X., Francies, H.E., Secrier, M., Perner, J., Miremadi, A., Galeano-Dalmau, N., Barendt,  
754 W.J., Letchford, L., Leyden, G.M., Goffin, E.K., *et al.* (2018). Organoid cultures  
755 recapitulate esophageal adenocarcinoma heterogeneity providing a model for clonality  
756 studies and precision therapeutics. *Nat Commun* 9, 2983.
- 757 Li, X., Nadauld, L., Ootani, A., Corney, D.C., Pai, R.K., Gevaert, O., Cantrell, M.A., Rack,  
758 P.G., Neal, J.T., Chan, C.W., *et al.* (2014). Oncogenic transformation of diverse  
759 gastrointestinal tissues in primary organoid culture. *Nat Med* 20, 769-777.
- 760 Lo, Y.H., Karlsson, K., and Kuo, C.J. (2020). Applications of Organoids for Cancer Biology  
761 and Precision Medicine. *Nat Cancer* 1, 761-773.
- 762 Lo, Y.H., Kolahi, K.S., Du, Y., Chang, C.Y., Krokhotin, A., Nair, A., Sobba, W.D., Karlsson, K.,  
763 Jones, S.J., Longacre, T.A., *et al.* (2021). A CRISPR/Cas9-engineered ARID1A-deficient  
764 human gastric cancer organoid model reveals essential and non-essential modes of  
765 oncogenic transformation. *Cancer Discov.*
- 766 Matano, M., Date, S., Shimokawa, M., Takano, A., Fujii, M., Ohta, Y., Watanabe, T., Kanai,  
767 T., and Sato, T. (2015). Modeling colorectal cancer using CRISPR-Cas9-mediated  
768 engineering of human intestinal organoids. *Nat Med* 21, 256-262.
- 769 Morgan, M., Anders, S., Lawrence, M., Aboyoun, P., Pages, H., and Gentleman, R. (2009).  
770 ShortRead: a bioconductor package for input, quality assessment and exploration of  
771 high-throughput sequence data. *Bioinformatics* 25, 2607-2608.
- 772 Nadauld, L.D., Garcia, S., Natsoulis, G., Bell, J.M., Miotke, L., Hopmans, E.S., Xu, H., Pai,  
773 R.K., Palm, C., Regan, J.F., *et al.* (2014). Metastatic tumor evolution and organoid  
774 modeling implicate TGFBR2 as a cancer driver in diffuse gastric cancer. *Genome Biol*  
775 15, 428.

- 776 Neal, J.T., Li, X., Zhu, J., Giangarra, V., Grzeskowiak, C.L., Ju, J., Liu, I.H., Chiou, S.H.,  
777 Salahudeen, A.A., Smith, A.R., *et al.* (2018). Organoid Modeling of the Tumor Immune  
778 Microenvironment. *Cell* 175, 1972-1988 e1916.
- 779 Nunez, J.K., Chen, J., Pommier, G.C., Cogan, J.Z., Replogle, J.M., Adriaens, C., Ramadoss,  
780 G.N., Shi, Q., Hung, K.L., Samelson, A.J., *et al.* (2021). Genome-wide programmable  
781 transcriptional memory by CRISPR-based epigenome editing. *Cell*.
- 782 Oh, D.Y., and Bang, Y.J. (2020). HER2-targeted therapies - a role beyond breast cancer. *Nat*  
783 *Rev Clin Oncol* 17, 33-48.
- 784 Rueda, O.M., Sammut, S.J., Seoane, J.A., Chin, S.F., Caswell-Jin, J.L., Callari, M., Batra, R.,  
785 Pereira, B., Bruna, A., Ali, H.R., *et al.* (2019). Dynamics of breast-cancer relapse reveal  
786 late-recurring ER-positive genomic subgroups. *Nature* 567, 399-404.
- 787 Salahudeen, A.A., Choi, S.S., Rustagi, A., Zhu, J., van Unen, V., de la, O.S., Flynn, R.A.,  
788 Margalef-Català, M., Santos, A.J.M., Ju, J., *et al.* (2020). Progenitor identification and  
789 SARS-CoV-2 infection in human distal lung organoids. *Nature* 588, 670-675.
- 790 Salahudeen, A.A., and Kuo, C.J. (2015). Toward recreating colon cancer in human organoids.  
791 *Nat Med* 21, 215-216.
- 792 Sanchez-Garcia, F., Villagrasa, P., Matsui, J., Kotliar, D., Castro, V., Akavia, U.D., Chen, B.J.,  
793 Saucedo-Cuevas, L., Rodriguez Barrueco, R., Llobet-Navas, D., *et al.* (2014). Integration  
794 of genomic data enables selective discovery of breast cancer drivers. *Cell* 159, 1461-  
795 1475.
- 796 Sato, T., Stange, D.E., Ferrante, M., Vries, R.G., Van Es, J.H., Van den Brink, S., Van Houdt,  
797 W.J., Pronk, A., Van Gorp, J., Siersema, P.D., *et al.* (2011). Long-term expansion of  
798 epithelial organoids from human colon, adenoma, adenocarcinoma, and Barrett's  
799 epithelium. *Gastroenterology* 141, 1762-1772.
- 800 Taira, N., Nihira, K., Yamaguchi, T., Miki, Y., and Yoshida, K. (2007). DYRK2 is targeted to  
801 the nucleus and controls p53 via Ser46 phosphorylation in the apoptotic response to  
802 DNA damage. *Mol Cell* 25, 725-738.
- 803 Tandon, V., de la Vega, L., and Banerjee, S. (2021). Emerging roles of DYRK2 in cancer. *J*  
804 *Biol Chem* 296, 100233.
- 805 Tomlins, S.A., Rhodes, D.R., Perner, S., Dhanasekaran, S.M., Mehra, R., Sun, X.W.,  
806 Varambally, S., Cao, X., Tchinda, J., Kuefer, R., *et al.* (2005). Recurrent fusion of  
807 TMPRSS2 and ETS transcription factor genes in prostate cancer. *Science* 310, 644-648.

- 808 Turner, N., Pearson, A., Sharpe, R., Lambros, M., Geyer, F., Lopez-Garcia, M.A., Natrajan,  
809 R., Marchio, C., Iorns, E., Mackay, A., *et al.* (2010). FGFR1 amplification drives  
810 endocrine therapy resistance and is a therapeutic target in breast cancer. *Cancer Res*  
811 *70*, 2085-2094.
- 812 Valenzuela, C.A., Vargas, L., Martinez, V., Bravo, S., and Brown, N.E. (2017). Palbociclib-  
813 induced autophagy and senescence in gastric cancer cells. *Exp Cell Res* *360*, 390-396.
- 814 van de Wetering, M., Francies, H.E., Francis, J.M., Bounova, G., Iorio, F., Pronk, A., van  
815 Houdt, W., van Gorp, J., Taylor-Weiner, A., Kester, L., *et al.* (2015). Prospective  
816 derivation of a living organoid biobank of colorectal cancer patients. *Cell* *161*, 933-945.
- 817 van Dyk, E., Hoogstraat, M., Ten Hoeve, J., Reinders, M.J., and Wessels, L.F. (2016). RUBIC  
818 identifies driver genes by detecting recurrent DNA copy number breaks. *Nat Commun* *7*,  
819 12159.
- 820 Vermeulen, P.B., Gasparini, G., Fox, S.B., Colpaert, C., Marson, L.P., Gion, M., Belien, J.A.,  
821 de Waal, R.M., Van Marck, E., Magnani, E., *et al.* (2002). Second international  
822 consensus on the methodology and criteria of evaluation of angiogenesis quantification  
823 in solid human tumours. *Eur J Cancer* *38*, 1564-1579.
- 824 Weaver, A., and Bossaer, J.B. (2021). Fibroblast growth factor receptor (FGFR) inhibitors: A  
825 review of a novel therapeutic class. *J Oncol Pharm Pract* *27*, 702-710.
- 826 Wong, G.S., Zhou, J., Liu, J.B., Wu, Z., Xu, X., Li, T., Xu, D., Schumacher, S.E., Puschhof,  
827 J., McFarland, J., *et al.* (2018). Targeting wild-type KRAS-amplified gastroesophageal  
828 cancer through combined MEK and SHP2 inhibition. *Nat Med* *24*, 968-977.
- 829 Yan, K.S., Janda, C.Y., Chang, J., Zheng, G.X.Y., Larkin, K.A., Luca, V.C., Chia, L.A., Mah,  
830 A.T., Han, A., Terry, J.M., *et al.* (2017). Non-equivalence of Wnt and R-spondin ligands  
831 during Lgr5(+) intestinal stem-cell self-renewal. *Nature* *545*, 238-242.
- 832 Yang, X., Boehm, J.S., Yang, X., Salehi-Ashtiani, K., Hao, T., Shen, Y., Lubonja, R., Thomas,  
833 S.R., Alkan, O., Bhimdi, T., *et al.* (2011). A public genome-scale lentiviral expression  
834 library of human ORFs. *Nat Methods* *8*, 659-661.
- 835 Zack, T.I., Schumacher, S.E., Carter, S.L., Cherniack, A.D., Saksena, G., Tabak, B.,  
836 Lawrence, M.S., Zhsng, C.Z., Wala, J., Mermel, C.H., *et al.* (2013). Pan-cancer patterns  
837 of somatic copy number alteration. *Nat Genet* *45*, 1134-1140.
- 838

# Figure 1

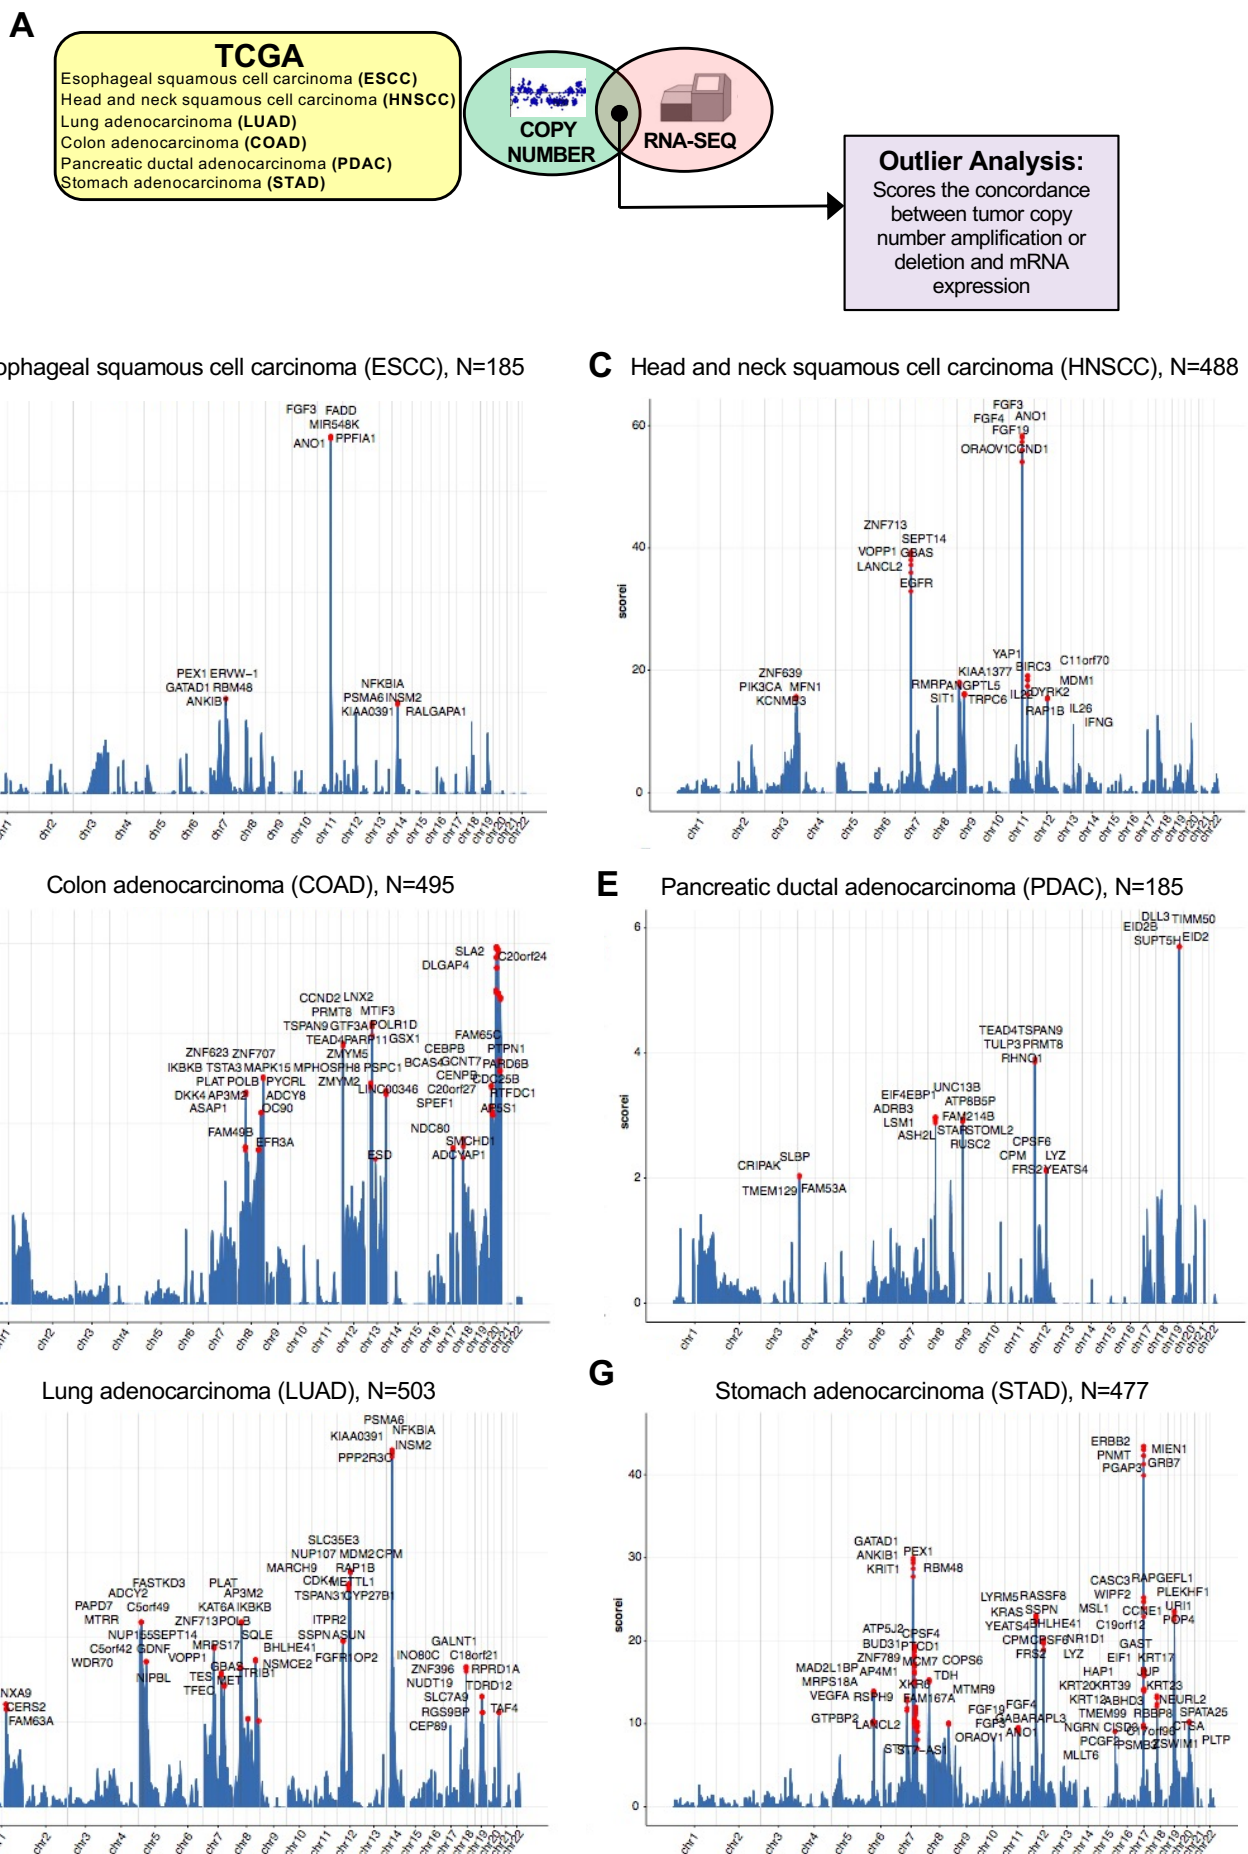

## Figure 2

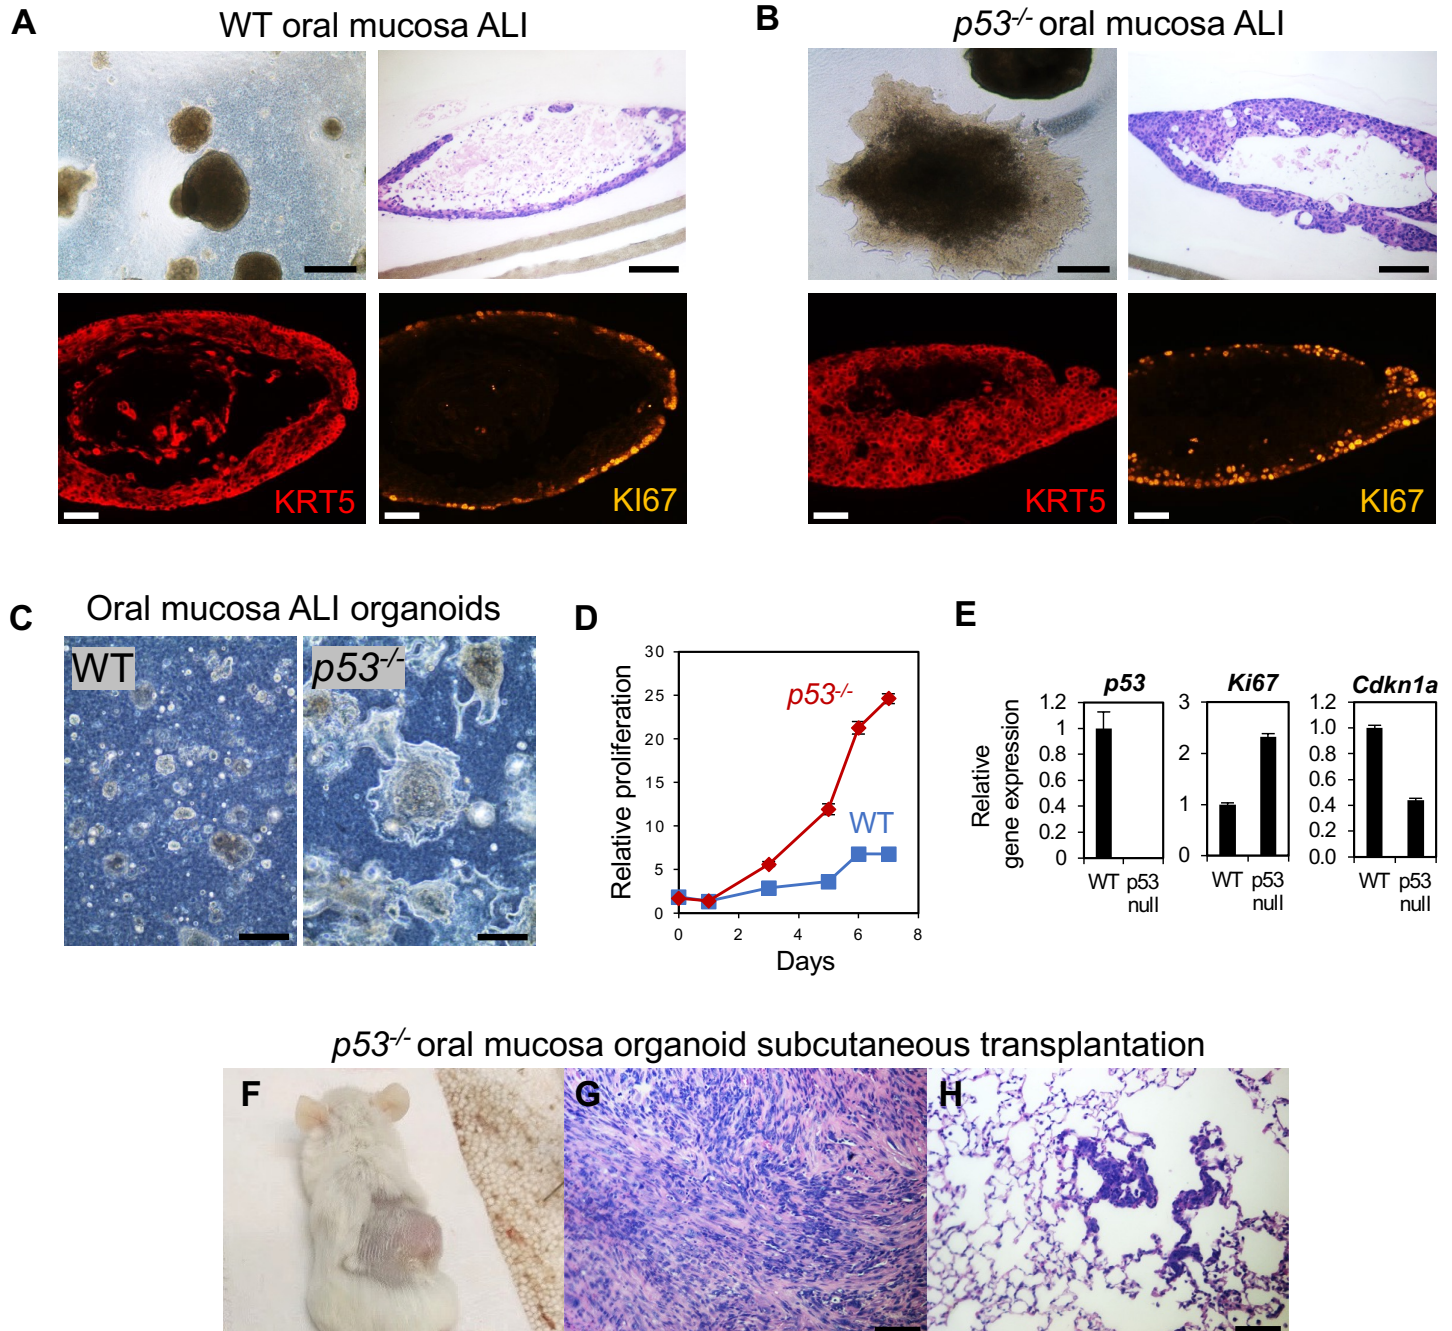

## Figure 3

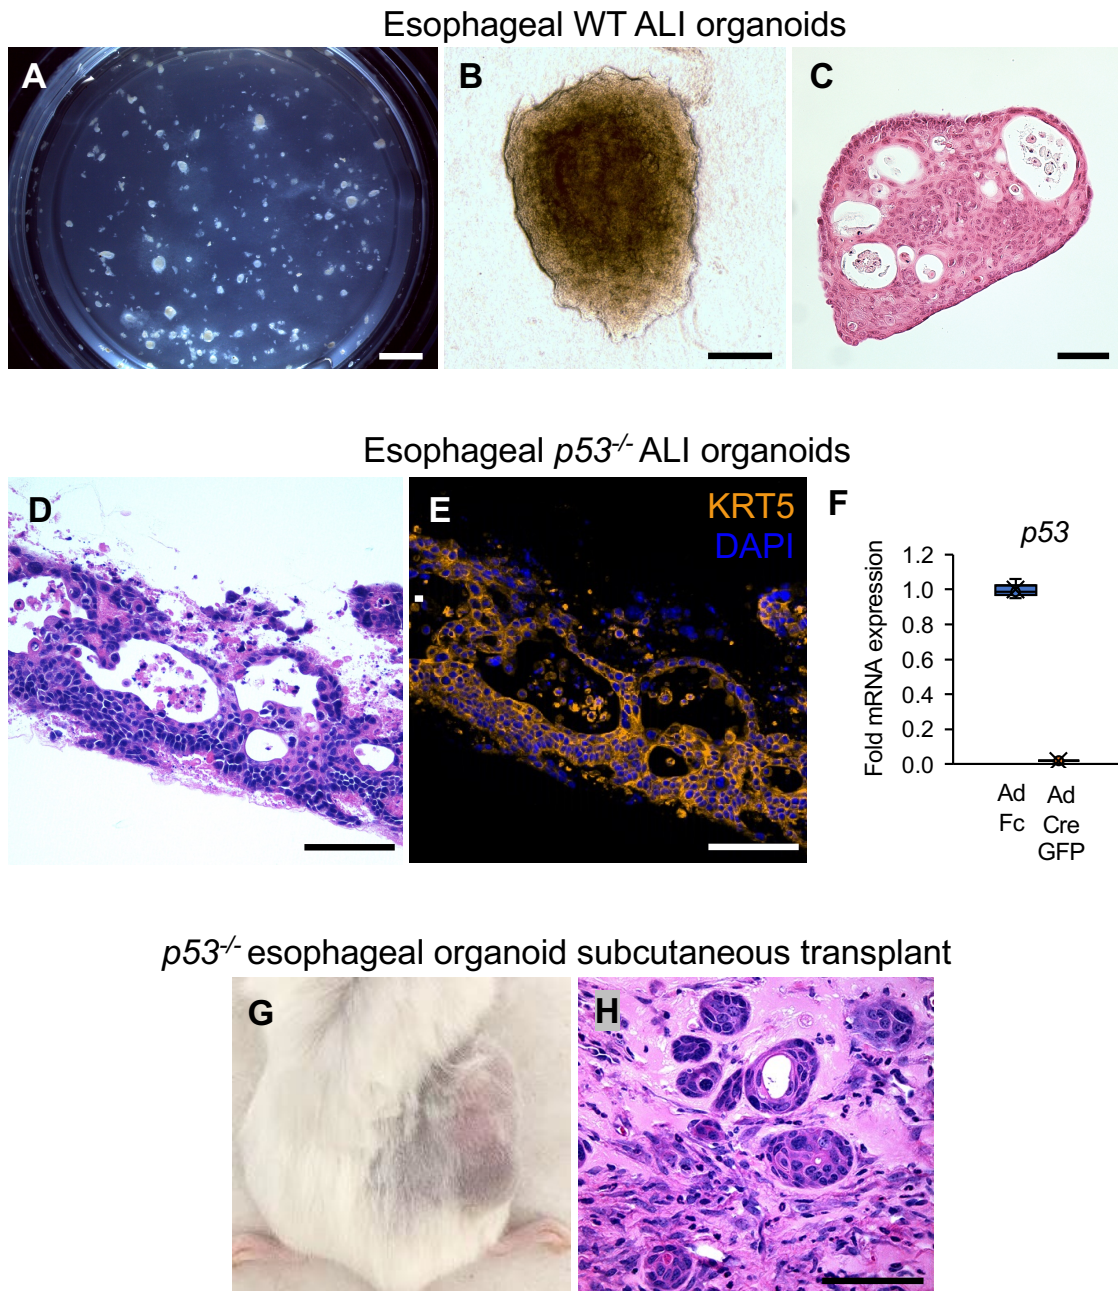

## Figure 4

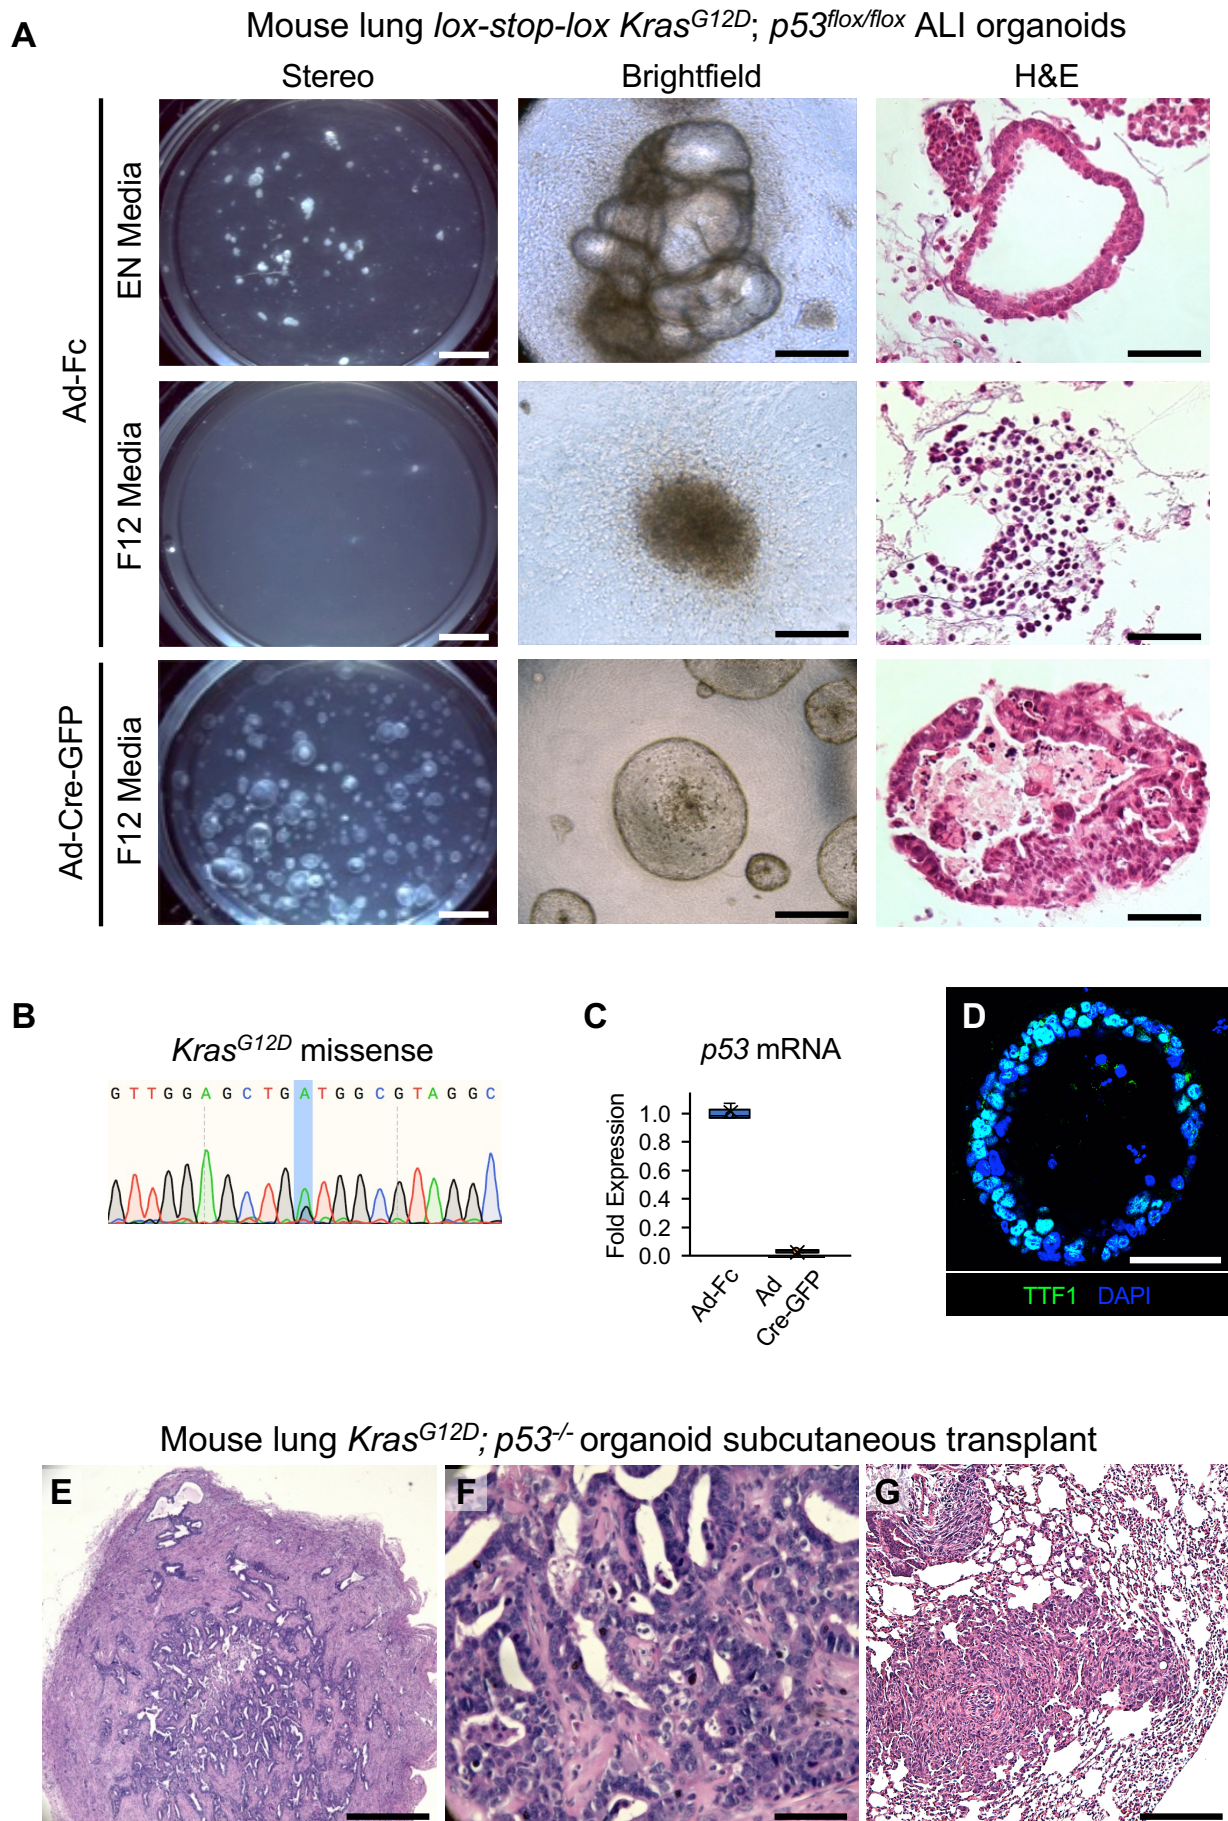



Figure 5

bioRxiv preprint doi: <https://doi.org/10.1101/2021.10.05.463147>; this version posted October 6, 2021. The copyright holder for this preprint (which was not certified by peer review) is the author/funder. All rights reserved. No reuse allowed without permission.

A

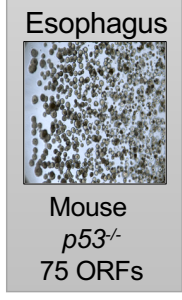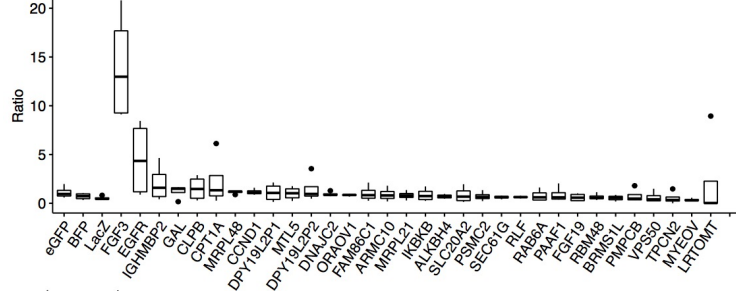

B

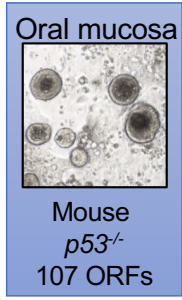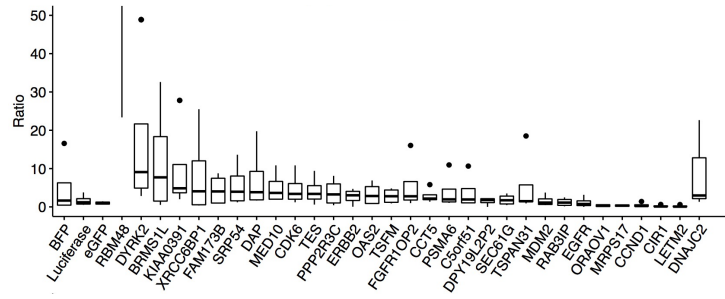

C

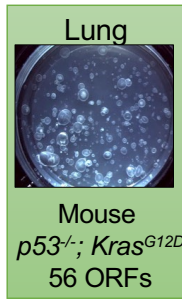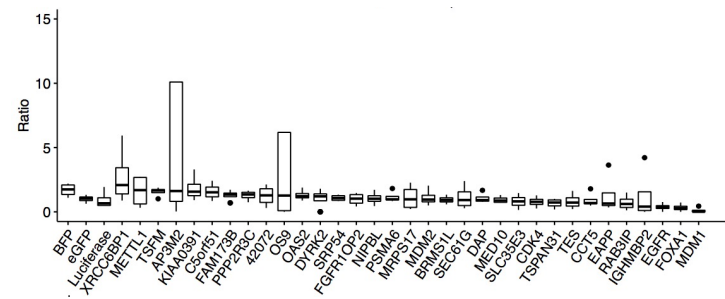

D

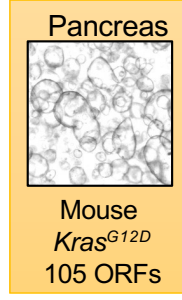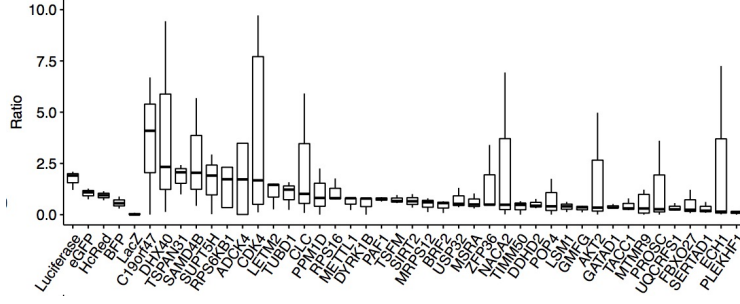

E

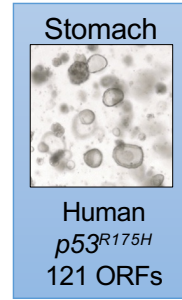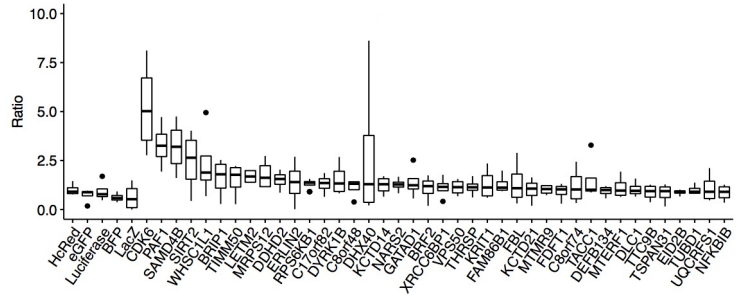

F

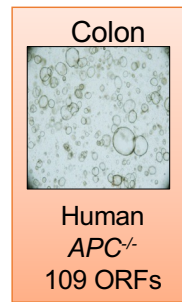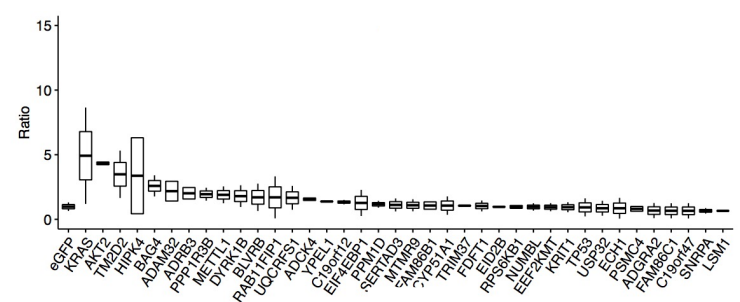

## Figure 6

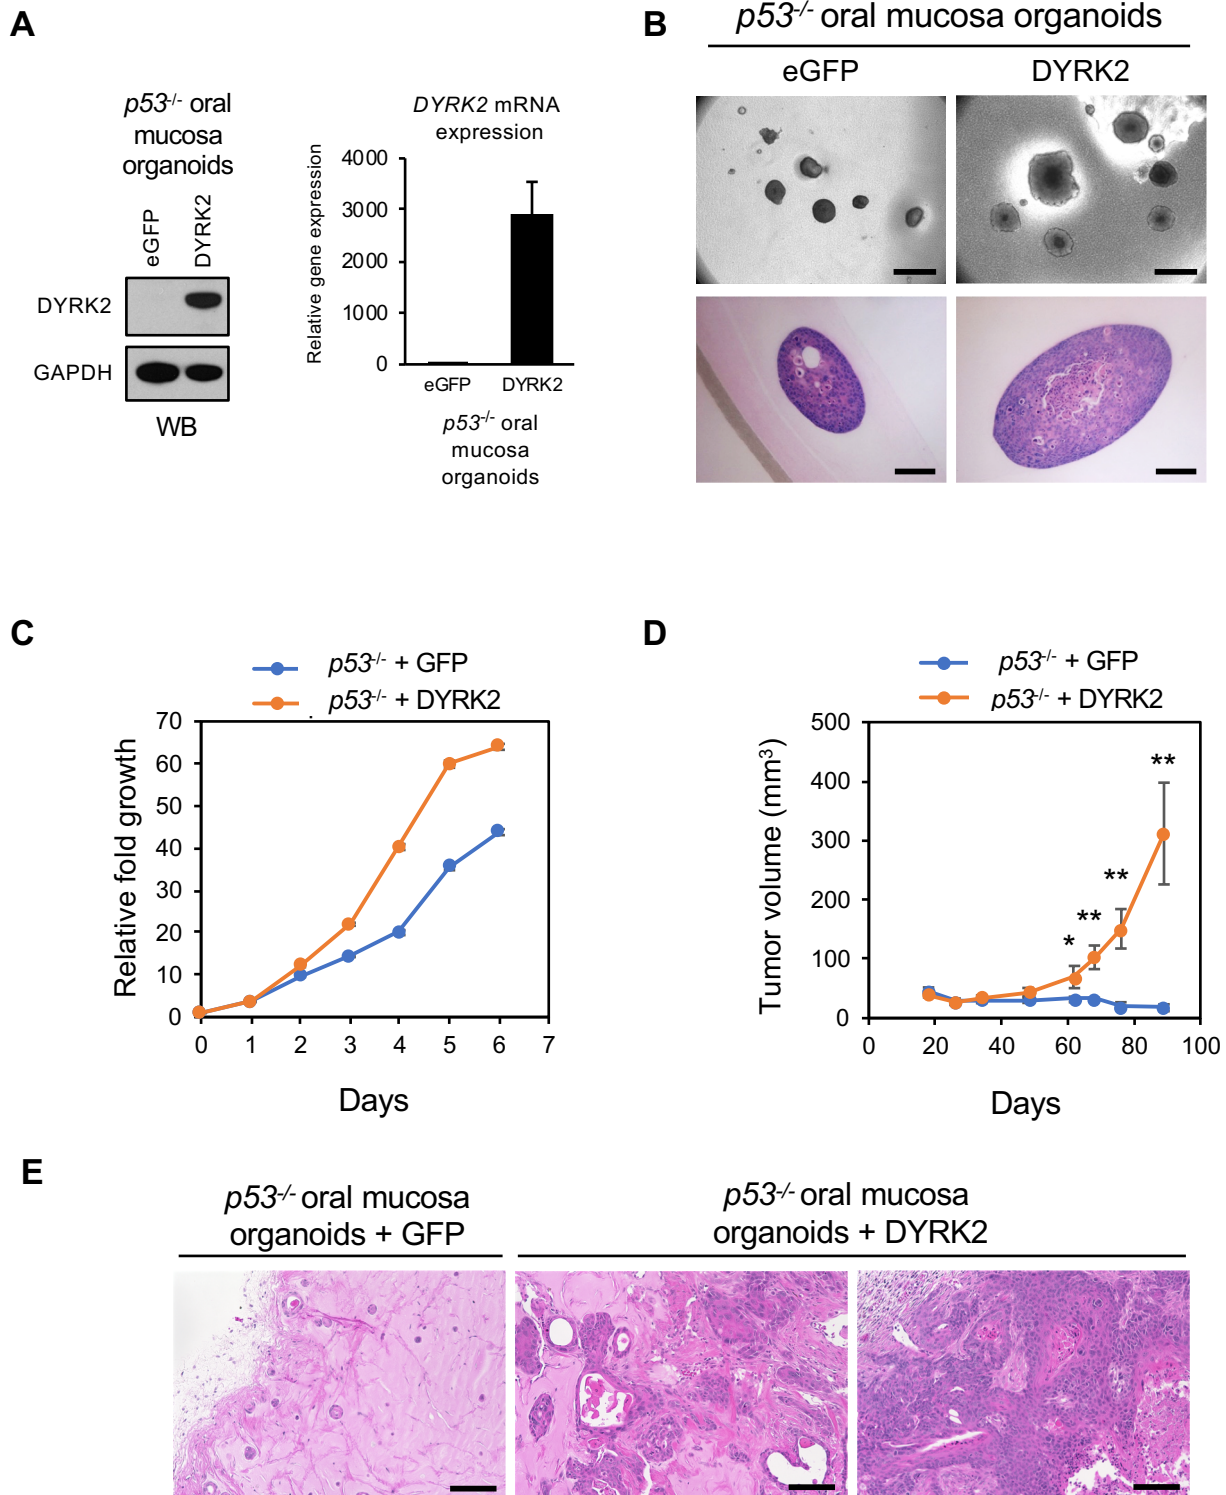

# Figure 7

*p53*<sup>-/-</sup> esophageal organoids + FGF3 in vitro

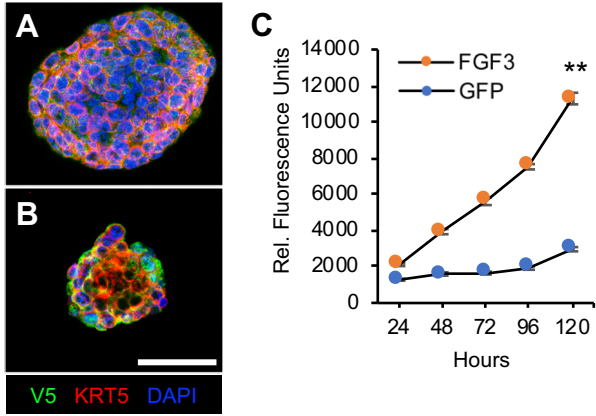

*p53*<sup>-/-</sup> esophageal organoids + FGF3 in vivo

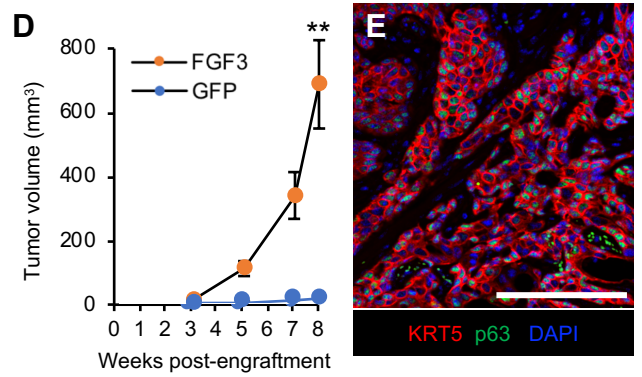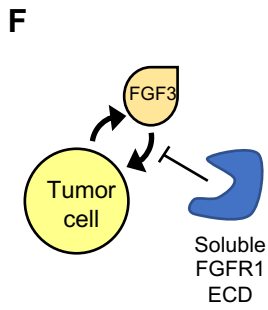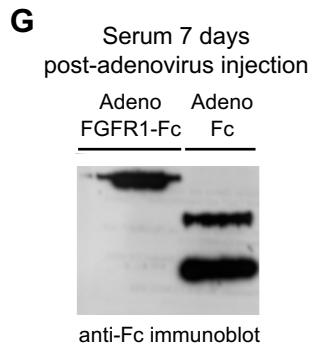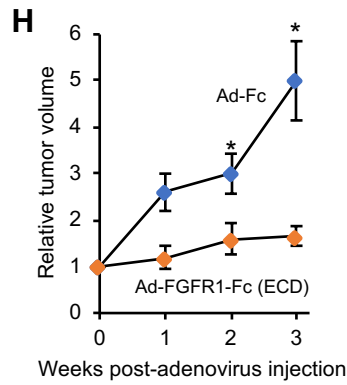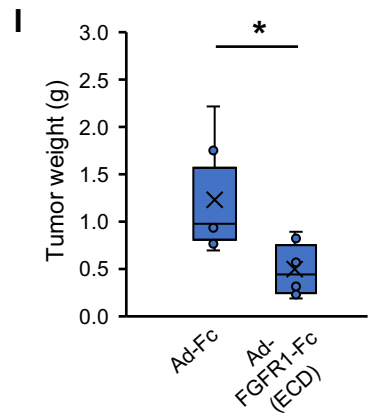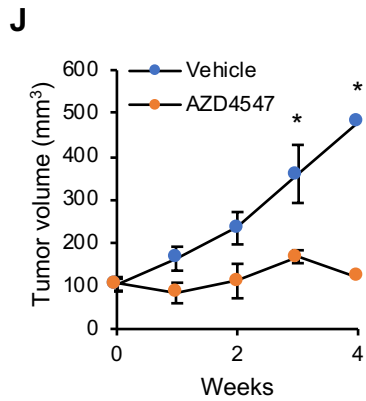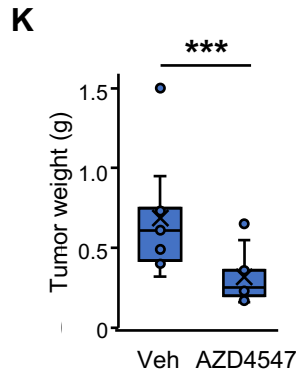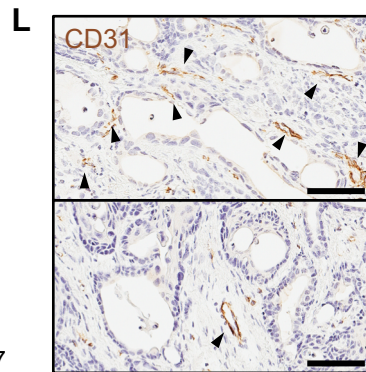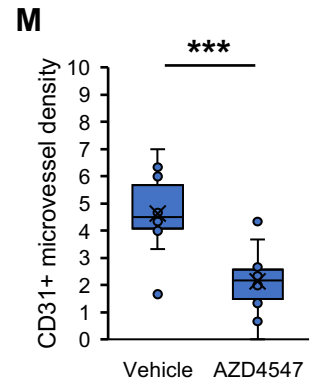

Source: https://biorxiv.org/content/10.1101/2021.10.05.463147v1.full.pdf
